# Supplementary material for: Effects of a community-based multicomponent rehabilitation programme for patients with fibromyalgia: protocol for a randomised controlled trial
Source: PubMed Central journal article supplement — BMJ Open. 2018 Jun 4;8(6):e021004. doi: 10.1136/bmjopen-2017-021004 (PMC5988178; doi:10.1136/bmjopen-2017-021004), 2018-06-04
Supplement: bmjopen-2017-021004.draft_revisions.pdf [file bmjopen-2017-021004.draft_revisions.pdf]

# BMJ Open

BMJ Open is committed to open peer review. As part of this commitment we make the peer review history of every article we publish publicly available.

When an article is published we post the peer reviewers' comments and the authors' responses online. We also post the versions of the paper that were used during peer review. These are the versions that the peer review comments apply to.

The versions of the paper that follow are the versions that were submitted during the peer review process. They are not the versions of record or the final published versions. They should not be cited or distributed as the published version of this manuscript.

BMJ Open is an open access journal and the full, final, typeset and author-corrected version of record of the manuscript is available on our site with no access controls, subscription charges or pay-per-view fees (<http://bmjopen.bmj.com>).

If you have any questions on BMJ Open's open peer review process please email [info.bmjopen@bmj.com](mailto:info.bmjopen@bmj.com)

# BMJ Open

## Effects of a community-based multicomponent rehabilitation programme for patients with fibromyalgia: Protocol for a randomised controlled trial

|                               |                                                                                                                                                                                                                                                                                                                                                                                                                                                                                                                                                                                                                                                       |
|-------------------------------|-------------------------------------------------------------------------------------------------------------------------------------------------------------------------------------------------------------------------------------------------------------------------------------------------------------------------------------------------------------------------------------------------------------------------------------------------------------------------------------------------------------------------------------------------------------------------------------------------------------------------------------------------------|
| Journal:                      | <i>BMJ Open</i>                                                                                                                                                                                                                                                                                                                                                                                                                                                                                                                                                                                                                                       |
| Manuscript ID                 | bmjopen-2017-021004                                                                                                                                                                                                                                                                                                                                                                                                                                                                                                                                                                                                                                   |
| Article Type:                 | Protocol                                                                                                                                                                                                                                                                                                                                                                                                                                                                                                                                                                                                                                              |
| Date Submitted by the Author: | 06-Dec-2017                                                                                                                                                                                                                                                                                                                                                                                                                                                                                                                                                                                                                                           |
| Complete List of Authors:     | Haugmark, Trond; Diakonhjemmet Sykehus AS, Department of Rheumatology: National Advisory Unit on Rehabilitation in Rheumatology Hagen, Kåre Birger ; Diakonhjemmet Sykehus AS, Department of Rheumatology: National Advisory Unit on Rehabilitation in Rheumatology; University of Oslo, Institute of Health and Society, Faculty of Medicine Provan, Sella; Diakonhjemmet Sykehus AS, Department of Rheumatology Bærheim, Elisebeth; Norwegian League Against Rheumatism Zangi, Heidi; Diakonhjemmet Sykehus AS, Department of Rheumatology: National Advisory Unit on Rehabilitation in Rheumatology; VID Specialized University, Faculty of Health |
| Keywords:                     | Fibromyalgia, Rehabilitation, Mindfulness-and acceptance based interventions, Physical activity, Health promotion, Primary health care                                                                                                                                                                                                                                                                                                                                                                                                                                                                                                                |
|                               |                                                                                                                                                                                                                                                                                                                                                                                                                                                                                                                                                                                                                                                       |

SCHOLARONE™  
Manuscripts

1  
2  
3  
4 **Effects of a community-based multicomponent rehabilitation programme for**  
5 **patients with fibromyalgia: Protocol for a randomised controlled trial**  
6  
7  
8  
9

10  
11 Trond Haugmark<sup>1</sup>, Kåre Birger Hagen<sup>1,2</sup>, Sella Aarrestad Provan<sup>3</sup>, Elisebeth Bærheim<sup>4</sup> Heidi  
12  
13 A. Zangi<sup>1,5</sup>  
14  
15

16  
17 **Author details**  
18

19  
20 <sup>1</sup>National Advisory Unit on Rehabilitation in Rheumatology, Department of Rheumatology,  
21  
22 Diakonhjemmet Hospital, PO Box 23 Vinderen, N-0319 Oslo, Norway  
23

24 <sup>2</sup>Institute of Health and Society, Faculty of Medicine, University of Oslo, Norway  
25

26 <sup>3</sup>Department of Rheumatology, Diakonhjemmet Hospital, Oslo, Norway  
27

28 <sup>4</sup>Norwegian League Against Rheumatism, Oslo, Norway  
29

30 <sup>5</sup>Faculty of Health, VID Specialized University, Oslo, Norway  
31  
32  
33  
34

35 **Corresponding author:**  
36

37 Trond Haugmark, <sup>1</sup>National Advisory Unit on Rehabilitation in Rheumatology, Department  
38  
39 of Rheumatology, Diakonhjemmet Hospital, PO Box 23 Vinderen, N-0319 Oslo, Norway  
40

41 Phone number: +47 95130795      Telefax: +47 22 45 48 50  
42

43 E-mail: [trond.haugmark@diakonsyk.no](mailto:trond.haugmark@diakonsyk.no)  
44  
45  
46  
47

48 **Keywords:** fibromyalgia, rehabilitation, primary health care, mindfulness- and acceptance  
49  
50 based interventions, physical activity, health promotion  
51  
52

53 **Word Count:** 4321 words  
54  
55  
56  
57

## Abstract

**Introduction** People with fibromyalgia suffer from symptoms such as widespread pain, nonrefreshing sleep, fatigue and reduced quality of life. Efficacy of pharmacological treatment is questionable and non-pharmacological treatments are recommended as first-line therapy. To date the majority of fibromyalgia patients in Norway are not offered any targeted treatment. The aim of this randomised controlled trial is to investigate the effects of a community-based multicomponent rehabilitation program comprising an acceptance- and mindfulness-based group intervention, the Vitality Training Programme (VTP), followed by tailored physical activity counselling.

**Materials and methods** General practitioners refer potential participants to a rheumatologist in specialist health care for diagnostic clarification and assessment of comorbidities. Inclusion criteria are widespread pain/fibromyalgia  $\geq$  three months, age 20 to 50 and work participation (minimum part-time) within the last two years. The intervention group attends the VTP comprising ten weekly four-hour group sessions plus a booster session after six months. Thereafter, they receive twelve weeks of individually tailored physical activity counselling by physiotherapists at community-based Healthy Life Centers. The control group follows treatment as usual. The primary outcome is Patient Global Impression of Change. Secondary outcomes include self-reported pain, fatigue and sleep quality, psychological distress, mindfulness, health-related quality of life, physical activity, work ability and exercise beliefs and habits. To achieve a power of 80% and allow for 10% dropout, 70 participants are needed in each arm. All analyses will be conducted on intention-to-treat bases and measured as differences between groups at 12 months follow-up.

**Ethics and dissemination** The study is approved and granted by the Norwegian South-Eastern Regional Health Authority (reference 2016015). Ethics approval was obtained from Regional Committee for Medical and Health Research Ethics (reference 2015/2447/REK sør-øst A).

1  
2  
3 Results will be submitted to appropriate journals and presented in relevant conferences and  
4  
5 social media.  
6

7 **Trial registration** ISRCTN 96836577. Registered 12 July 2016.  
8  
9

## 10 **Strengths and limitations of the study**

11  
12

- 13 • The multicomponent rehabilitation programme consists of modalities that have  
14  
15 previously been found to be effective for people with rheumatic and musculoskeletal  
16  
17 diseases.  
18  
19
- 20 • Sustainability of effects will be measured at one year follow-up.  
21
- 22 • The inclusion of patients from both rural and urban communities will enhance the  
23  
24 generalisability of the results.  
25  
26
- 27 • It is not possible to examine the effectiveness of single components of the programme.  
28
- 29 • Some participants may experience the multicomponent rehabilitation programme to be  
30  
31 too comprehensive and time-consuming.  
32  
33  
34  
35  
36  
37  
38  
39  
40  
41  
42  
43  
44  
45  
46  
47  
48  
49  
50  
51  
52  
53  
54  
55  
56  
57  
58  
59  
60

## Introduction

Fibromyalgia (FM) is a heterogeneous and still unexplained disease that poses major personal and societal challenges in terms of costs and complexity. It is one of the most common chronic pain conditions with an estimated prevalence of 2 % worldwide<sup>1</sup>. In Norway, it is estimated that FM affects as much as 6% of the women and 3 % of the men<sup>2</sup>. The cardinal symptom of FM is widespread pain characterised by reduced pressure pain thresholds and hyperalgesia. In 2010 the American College of Rheumatology (ACR) introduced new diagnostic criteria that also included other somatic symptoms, such as nonrefreshing sleep, fatigue, difficulties with memory and concentration, irritable bowel syndrome, headache and depression<sup>3</sup>. The complexity of FM symptoms constitutes a major burden for individuals and is a common cause of sick leave, disability benefit and extensive use of health care services<sup>2</sup>. Although the FM diagnosis has become increasingly recognised during the last decades, there are still some physicians who question its validity. Several patients experience disbelief, lack of understanding and stigmatisation from their general practitioners (GPs) as well as from the social security systems, colleagues and family<sup>1 4</sup>.

Current treatments for FM are non-curative and the efficacy of pharmacological treatment alone is questionable<sup>5</sup>. Recent updated evidence-based recommendations from the European League Against Rheumatism (EULAR) conclude that optimal management requires prompt diagnosis and thereafter a graduated follow-up<sup>6</sup>. The initial management of FM should focus on patient education and non-pharmacological interventions, such as graded physical exercise and individually tailored psychological therapies for those with mood disorder or unhelpful coping strategies. The interventions may be combined in multicomponent rehabilitation programmes. Pharmacotherapy is only recommended for severe pain and sleep disturbances<sup>6</sup>.

In Norway the main responsibility for management of FM is assigned to the primary health care services<sup>7</sup>. Some FM patients are referred to physiotherapists and a few to rehabilitation

1  
2  
3 in specialist care. However, to date, the majority of FM patients are not offered any tailored  
4  
5 treatment in the primary health care.  
6

### 7 **Mindfulness- and acceptance-based training for FM patients**

8  
9  
10 Mindfulness training has been defined as training in moment-to-moment awareness of internal  
11  
12 experiences, such as thoughts, emotions and body sensations with an attitude of openness,  
13  
14 curiosity, patience and acceptance<sup>8</sup>. In mindfulness practices, thoughts, emotions and  
15  
16 sensations are not judged as good or bad, positive or negative, but as experiences and objects  
17  
18 of awareness that we can relate to. Increased acceptance is believed to decrease the struggle to  
19  
20 control what might not be controllable and seems to be associated with better treatment  
21  
22 outcomes for pain patients<sup>9</sup>. Systematic reviews on mindfulness training for patients with FM  
23  
24 have shown evidence for small, but significant improvements of pain and quality of life<sup>10 11</sup>.  
25  
26

27  
28 A Norwegian a mindfulness- and acceptance-based group intervention, the Vitality Training  
29  
30 Programme (VTP) was developed for patients with chronic musculoskeletal pain in the late  
31  
32 1990s<sup>12</sup>. It was later adjusted for patients with inflammatory arthritis (IA)<sup>13</sup>. The VTP  
33  
34 incorporates mindfulness training, values-based action and various creative methods. The  
35  
36 main goals are to enhance participants' awareness of their health promoting resources and to  
37  
38 strengthen their inner authority and abilities to make conscious choices in line with their  
39  
40 personal values. Two randomized controlled trials on the VTP, one in patients with chronic  
41  
42 musculoskeletal pain and one in patients with IA, showed reduced emotional distress,  
43  
44 improved pain coping and mental well-being in the intervention groups compared to the  
45  
46 control groups. The group with IA also showed decreased fatigue and increased self-efficacy.  
47  
48 The effects were sustained or increased at one year follow-up<sup>13 14</sup>. However, a longitudinal  
49  
50 pre-post-test study on the VTP in patients with IA and FM showed substantial improvements  
51  
52 in the IA group, but no changes in the FM group. The reason for these differences remains  
53  
54 unclear, but it may be related to the long disease duration in the FM patients. Living with pain  
55  
56  
57  
58  
59  
60

1  
2  
3 over many years without access to relevant treatment might lead to development of  
4  
5 maladaptive coping strategies that may be difficult to change. Hence, it was suggested that  
6  
7 future studies should investigate effects of the VTP in FM patients with more recent disease  
8  
9 onset<sup>15 16</sup>. The VTP is implemented in some rheumatology specialist departments and in  
10  
11 specialist rehabilitation, but to date there is no systematic implementation and evaluation in  
12  
13 primary health care.  
14

### 15 16 **Physical exercise for FM patients**

17  
18 Studies have demonstrated that compared to healthy women people with FM are less  
19  
20 physically active and have lower perceived functional ability<sup>17</sup>. Two systematic reviews on  
21  
22 physical exercise in FM patients found evidence that aerobic exercise reduces pain, fatigue  
23  
24 and depressed mood and improves health-related quality of life and physical fitness<sup>17 18</sup>. The  
25  
26 amount and intensity of initial aerobic exercises should be adapted to the individual level of  
27  
28 physical fitness and patients should start at a level just below their capacity and gradually  
29  
30 increase the duration and intensity<sup>18</sup>. Studies have demonstrated that appropriately progressed  
31  
32 muscle strengthening activities is safe and effective for individuals with FM and should be  
33  
34 considered as part of a multi-faceted treatment plan<sup>17</sup>.  
35  
36

37  
38 Since 2004, Healthy Life Centres (HLC) have been established in most Norwegian  
39  
40 municipalities<sup>19</sup>. The HLCs are based on a salutogenic framework aiming at strengthening  
41  
42 peoples' capacities to use their own health resources and make health-friendly choices. They  
43  
44 provide low-threshold easily accessible activities and interventions targeted at supporting  
45  
46 behavioural changes and management of lifestyle issues, such as indoor and outdoor physical  
47  
48 activity, healthy diet courses, smoking cessation and short mental health interventions. The  
49  
50 physical activity interventions include aerobic and strengthening exercises usually twice a  
51  
52 week for a 12-week period. Some HLCs also offer yoga and mindfulness exercises. Health  
53  
54 professionals working at HLCs are mainly physiotherapists and nutritionists. All are educated  
55  
56  
57



1  
2  
3 in Motivational interviewing (MI), which is both a treatment philosophy and a set of methods  
4  
5 employed to help people increase intrinsic motivation by exploring and resolving ambivalence  
6  
7 about behavioural change. MI has demonstrated effectiveness for clients regardless of  
8  
9 problem severity, age, and gender<sup>20</sup>. One of the main groups that utilise HLCs is people with  
10  
11 chronic pain condition, including FM. However, many FM patients are reluctant to  
12  
13 participate in the general exercises because they are afraid of increasing their pain. For FM  
14  
15 patients it seems to be important that the exercise programmes are individually tailored and  
16  
17 that the graded approach is followed.  
18  
19

### 20 **Aim and research questions**

21  
22  
23 The overall aim of this trial is to evaluate the effectiveness of a multicomponent rehabilitation  
24  
25 programme for patients with newly diagnosed FM delivered in primary health care.  
26  
27

28 The primary objective is to study the hypothesis that patients with newly diagnosed FM who  
29  
30 participate in a community-based multicomponent rehabilitation programme will improve  
31  
32 their self-perceived health compared to patients who follow their “treatment as usual”. The  
33  
34 rehabilitation programme comprises the VTP plus 12 weeks physical activity counselling at a  
35  
36 HCL.  
37  
38

39 More specifically, the study will investigate the following research questions:  
40  
41

- 42 1. Does a community-based multicomponent rehabilitation programme relieve newly  
43  
44 diagnosed FM patients’ symptoms burden in terms of reduced pain, fatigue, sleep  
45  
46 disturbances and psychological distress?  
47
- 48 2. Does a community-based multicomponent rehabilitation programme increase FM  
49  
50 patients’ physical activity?  
51
- 52 3. Does a community-based multicomponent rehabilitation programme increase newly  
53  
54 diagnosed FM patients’ work ability?  
55  
56  
57

## **Trial development and design**

A project group including a patient representative, two GPs, a representative for community rehabilitation service, a rheumatologist and health professionals educated as VTP facilitators have been involved in the project development and will be consulted throughout the trial. The study is a pragmatic parallel randomised controlled trial with two arms (ISRCTN 96836577). The multicomponent rehabilitation program is a complex intervention with several interacting components and has followed the new Medical Research Council guidance for Developing and evaluating complex interventions<sup>21</sup>. The protocol has been developed in line with the SPIRIT guidelines (Standard Protocol Items: Recommendations for Interventional Trials)<sup>22</sup>.

## **Methods**

### **Study setting and recruitment of participants**

The trial is a collaboration between the rheumatology specialist department at Diakonhjemmet Hospital in Oslo, two municipal districts in the city of Oslo and six rural municipalities in geographical proximity to Oslo. GPs and physiotherapists in the eight municipalities will identify potential participants and refer the patients to a rheumatologist at Diakonhjemmet Hospital for diagnosis clarification and assessment of comorbidities. To enhance recruitment the project coordinator (TH) and the project leader (HAZ) have visited all GP offices in the eight municipalities and written information is sent by e-mail and per post. Moreover, flyers have been distributed to offices and waiting areas for potential patients to inform them to contact their GP if they are in the target group for the project. Information is also shared in relevant website and social media.

Patients will be examined and screened for eligibility by the rheumatologist. All eligible patients will be offered a three-hour FM group education programme by a rheumatologist and

1  
2  
3 a nurse, aimed at providing basic understanding about FM, pain mechanisms, psychological  
4 factors, physical activity and coping strategies. Short mindfulness and yoga exercises will be  
5 introduced. This programme is currently part of standard care for FM patients at  
6  
7 Diakonhjemmet Hospital. Additionally, the project coordinator will inform about the VTP and  
8  
9 present the logistics of the study. The participants have the opportunity to ask questions  
10  
11 before they consent to participate. The programme will be arranged regularly throughout the  
12  
13 recruitment period until the target sample size is obtained.  
14  
15

16  
17 The multicomponent rehabilitation programme will be conducted in the municipalities. HAZ  
18  
19 and TH will organise the VTP at central places in Oslo and the rural municipalities. The  
20  
21 physical activity counselling will take place at a HCL in the participants' home communities.  
22  
23 If the community has not yet established a HCL the participants will be referred to a HCL in a  
24  
25 nearby community. Participants will follow the HCL's ordinary 12-week physical activity  
26  
27 counselling group programme (see Figure 1).  
28  
29  
30  
31  
32

### 33 **Eligibility criteria**

34  
35 Patients are eligible for inclusion if they are diagnosed with FM according to the ARC 2010  
36  
37 criteria for fibromyalgia<sup>3</sup> and aged between 20 and 50 years. Patients will be excluded if they  
38  
39 have a comorbid inflammatory rheumatic disease, have been out of work for more than two  
40  
41 years due to their pain condition, have a serious psychiatric disorder, have another disease that  
42  
43 does not allow physical exercise, or are unable to understand and write Norwegian.  
44  
45  
46  
47

### 48 **Interventions**

#### 49 ***The Vitality Training Program***

50  
51  
52 The VTP comprises ten weekly four-hour group sessions plus a booster session after about six  
53  
54 months. Each group have between eight and twelve participants. Every session addresses a  
55  
56  
57

1  
2  
3 specific topic related to living with long-lasting health challenges: If my body could talk/  
4 Who am I?/ Values – what is important to me?/ What do I need?/ Strengths & limitations/ Bad  
5  
6 conscience/ Anger/ Joy/ Resources, potentials and choices/ The way ahead<sup>12 13</sup>. The  
7  
8 participants are invited to explore these topics by using various creative methods, such as  
9  
10 guided imagery, music, drawing, poetry and metaphors. The purpose is to provide  
11  
12 opportunities for personal discoveries by intentionally attending to emotional, cognitive and  
13  
14 bodily experiences. Participants are also invited to write logs from all exercises and to share  
15  
16 their experiences and discoveries with other group participants. Moreover, participants are  
17  
18 invited to attend to mindfulness meditation exercises, i.e. body scan, sitting and walking  
19  
20 meditation and breathing exercises. They are provided with guided mindfulness audio files  
21  
22 and are encouraged to practice these exercises in everyday life and to train awareness in daily  
23  
24 activities. Moreover, the VTP includes gentle yoga exercises that can help patients explore  
25  
26 their physical boundaries and overcome barriers to movement. Throughout the programme  
27  
28 participants learn how to balance rest with activity, identify activities that are important and  
29  
30 helpful to them, and how to overcome barriers to prioritise these activities (values-based  
31  
32 action).

33  
34  
35  
36  
37 All groups have two facilitators who are certified through a one-year university training  
38  
39 programme (30 crd) at VID Specialized University in Oslo. They follow a manual with a  
40  
41 thorough program description<sup>12</sup>. Adherence to the intervention, i.e. attendance in group  
42  
43 sessions will be recorded by the group facilitators. They will also be asked to report any  
44  
45 adverse events.  
46  
47  
48

### 49 ***Individual physical activity counselling and tailored physical activity***

50  
51 After completing the VTP, participants will be offered individual physical activity counselling  
52  
53 by a physiotherapist at the HLCs. Interviews based on MI with focus on individual planning  
54  
55 and goalsetting will be conducted before start up, after six weeks and at the end of week 12.  
56  
57

1  
2  
3 The purpose of the counselling is to help patients identify and overcome barriers to physical  
4 activity, to find exercises that can be easily continued in their everyday life and gradually  
5 increase their levels of physical activity. The physical activity will be adapted to each  
6 patient's individual level of physical fitness. The physiotherapists will record adherence to the  
7 HLC intervention and any adverse events during the 12-week period.  
8  
9  
10  
11  
12

### 13 **Control group**

14  
15  
16 Patients randomised to the control group will not receive any intervention other than the  
17 three-hour FM education. They will follow their "treatment as usual" in primary care, i.e. GP  
18 consultations and any physical activity they may choose. At the FM course all participants are  
19 told that they can follow any new information as they would like. This means that control  
20 group participants may initiate life-style changes on their own initiative. There are no  
21 restrictions on participation in physical activities during the trial. The control group will be  
22 offered the VTP after completion of the last data collection, i.e. one year after inclusion.  
23  
24  
25  
26  
27  
28  
29  
30  
31  
32  
33

### 34 **Outcomes**

35  
36 Outcome measures are selected according to the core set of domains for FM defined by the  
37 Outcome Measures in Rheumatology Clinical Trials (OMERACT)<sup>23</sup>. All outcomes are self-  
38 reported.  
39  
40  
41  
42

43 **Primary outcome** will be Patient Global Impression of Change (PGIC) measured by a 7-point  
44 self-reported Likert scale ranging from 1 ("I feel very much worse") through 4 ("no change")  
45 to 7 ("I feel very much better") one year after inclusion. Scores of 6 and 7 are considered  
46 clinically relevant improvement<sup>24</sup>. This measure has previously been used in FM trials<sup>25-27</sup>.  
47  
48  
49  
50

51 **Secondary outcomes** related to the specific research questions will be collected at baseline, 3  
52 and 12 months. The outcomes include:  
53  
54  
55  
56  
57

- 1  
2  
3 • *Pain, fatigue and sleep quality* assessed by Numerical Rating Scales (NRS) scored from 0  
4 - 10 (10 is intolerable pain/fatigue/very bad sleep quality).  
5
- 6  
7 • *Psychological distress* assessed by the General Health Questionnaire-12 (GHQ-12), a  
8 widely used screening instrument measuring aspects of psychological health during the  
9 last two weeks<sup>28</sup>. The GHQ-12 comprises six positively phrased items, indicating  
10 psychological health, and six negatively phrased items, indicating psychological distress.  
11 The respondents are requested to compare their current status with what they consider as  
12 their “normal” condition on a four point Likert scale, scored from 0 (less than usual) to 3  
13 (much more than usual). This gives a possible sum score between 0 (no distress at all) and  
14 36 (much more distress than usual)<sup>28 29</sup>.  
15
- 16 • *Mindfulness* assessed by The Five Factor Mindfulness Questionnaire (FFMQ) that  
17 measures a general tendency to be mindful in daily life. FFMQ comprises 39 items rated  
18 on a five-point Likert scale from 1 (never or very rarely true) to 5 (always or almost  
19 always true)<sup>30 31</sup>.  
20
- 21 • *Health-related quality of life* assessed by the EuroQol (EQ-5D-5 L) comprising five  
22 dimensions of mobility, self-care, usual activities, pain/ discomfort and anxiety/  
23 depression. Each dimension is scored on five levels: no problems, slight problems,  
24 moderate problems, severe problems and extreme problems. Additionally, “perceived  
25 health today” is scored from 0 (as bad as it could be) to 100 (as good as it could be)<sup>32</sup>.  
26 The instrument has been validated in similar populations<sup>33</sup> and in Norwegian context<sup>34</sup>.  
27
- 28 • *Physical activity* assessed by three questions addressing the average number of times  
29 exercising each week, and the average intensity and average duration each week<sup>35</sup>.  
30
- 31 • *Motivation and barriers for physical activity* assessed by the Exercise Beliefs and  
32 Exercise Habits questionnaire comprising twenty items that reflect beliefs about one’s  
33 ability to exercise, barriers to exercise, benefits of exercise, and impact of exercise on  
34  
35  
36  
37  
38  
39  
40  
41  
42  
43  
44  
45  
46  
47  
48  
49  
50  
51  
52  
53  
54  
55  
56  
57  
58  
59  
60

1  
2  
3 muscular pain. Items are scored on a five-points Likert scale, ranging from strongly agree  
4  
5 to strongly disagree<sup>36</sup>.

- 6  
7 • *Work ability* assessed by the Work Productivity and Activity Impairment General Health  
8  
9 version 2.1 (WPAI:GH) that comprises six questions to determine employment status,  
10  
11 hours missed from work because of health problems or other reasons, hours actually  
12  
13 worked, the degree to which health problems affected work productivity while at work  
14  
15 and activities outside of work<sup>37</sup>. WPAI outcomes are expressed as impairment  
16  
17 percentages with higher numbers indicating greater impairment and less productivity.  
18  
19

20 Moreover, the data collection includes self-reported health care consumption, i.e. visits to GP,  
21  
22 rheumatologist, physiotherapist and other health care professionals, use of medication and  
23  
24 alternative treatments. Self-reported harmful events will be assessed at 12 months.  
25  
26  
27

## 28 **Sample size**

29  
30 Sample size calculation is based on the primary outcome assuming that 10 % in the control  
31  
32 group will report that they “feel much better” or “very much better” after 12 months<sup>25</sup> and  
33  
34 that at least a 20 % absolute difference in improvement rate between the groups can be  
35  
36 considered as a minimal clinically relevant difference. We anticipate 10 % losses to follow-up  
37  
38 and will need 70 participants in each group to have at least 80 % power of detecting  
39  
40 differences with 5 % alpha level.  
41  
42  
43  
44  
45

## 46 **Randomisation and allocation concealment**

47  
48 A statistician has generated an electronic randomisation list based on blocks of 20 to 24 for  
49  
50 each geographical area to ensure approximately equal sample sizes. Participants will be given  
51  
52 consecutive numbers. A secretary not involved in the data collection or the intervention will  
53  
54 allocate each participant to the corresponding number on the randomisation list and inform the  
55  
56  
57

1  
2 patients about group allocation by telephone and written letter. Due to the nature of the  
3  
4 implementation strategy it is not possible to blind the patients or the health professionals. The  
5  
6 project leader and the research coordinator who are responsible for the data collection and  
7  
8 data analyses will not be aware of group allocation.  
9  
10

### 11 12 13 **Data collection**

14  
15 Participant flow is shown in Figure 1. Data will be collected electronically by a solution  
16  
17 delivered by Infopad (www.infopad.no) before randomisation (baseline), after the VTP (3  
18  
19 months), and at 12-months follow-up. This electronic solution is risk evaluated and follows  
20  
21 the Code of Conduct for information security in the health care and care services<sup>38</sup>.  
22  
23

24 Participants will be registered in the electronic system by the project coordinator. Participants  
25  
26 receive an e-mail with a unique link to the questionnaire at each assessment point and can  
27  
28 respond to the questionnaire on their individual electronic device (computer, mobile phone or  
29  
30 tablet). Participants who do not possess an electronic device will receive a paper version of  
31  
32 the questionnaire.  
33  
34  
35  
36  
37  
38  
39  
40  
41  
42  
43  
44  
45  
46  
47  
48  
49  
50  
51  
52  
53  
54  
55  
56  
57  
58  
59  
60



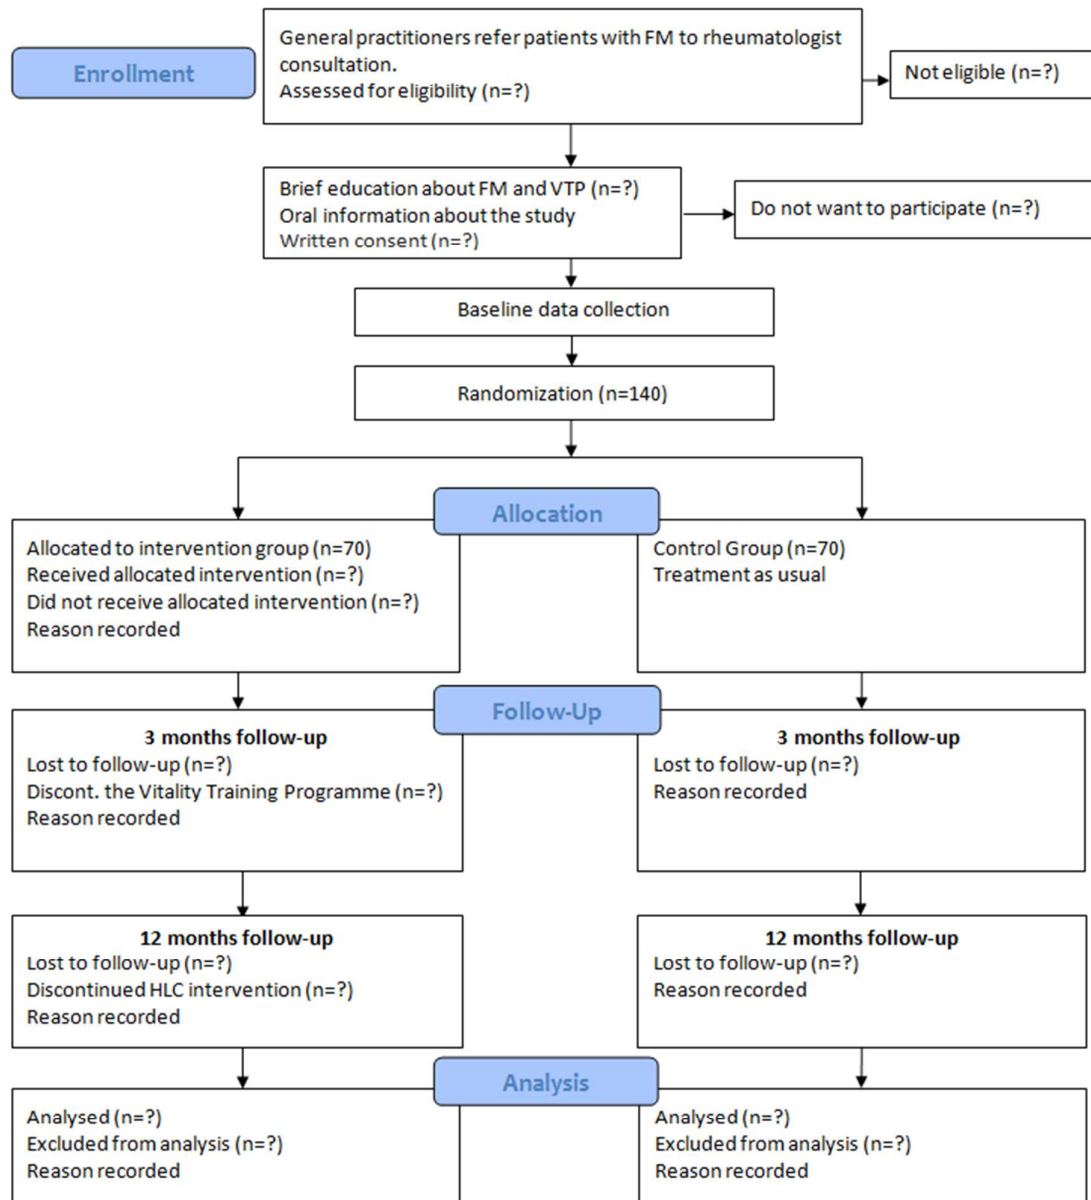

Fig. 1 Study Flow chart

## Statistical analysis

The treatment effects will be analysed on an intention-to-treat basis with all randomised participants retaining their original allocated group and measured as differences between groups at 12 months. Analyses of covariance (ANCOVA) will be used for continuous outcomes and logistic regression analyses for dichotomous outcomes. The level of

1  
2  
3 significance will be set to  $p \leq 0.05$  and the confidence level to 95 %. We will use the IBM  
4  
5 SPSS Statistics 24 (IBM Corporation) to analyse the data.  
6  
7

### 8 9 **Ethical approval**

10  
11 Study design, information strategy, written consent formula, and data security are approved  
12  
13 by the Regional Committee for Medical and Health Research Ethics (2015/2447/REK sør-øst  
14  
15 A). The trial will be carried out in accordance with the Helsinki Declaration. Participants will  
16  
17 receive written and oral information about the study processes and interventions before they  
18  
19 sign a written declaration of voluntary participation. They have the right to withdraw from the  
20  
21 study at any time without any explanation.  
22  
23

24  
25 All included participants will receive a consultation with a rheumatologist and a brief patient  
26  
27 education intervention that either corresponds to or is better than their currently provided care.  
28  
29 Participants who are randomised to the multicomponent rehabilitation programme will receive  
30  
31 a potentially more effective intervention. Control group participants will receive the current  
32  
33 standard of care that is delivered in their respective community. Thus, no participants will  
34  
35 receive an intervention that is below standard treatment. Any potential treatment harms will  
36  
37 be registered throughout the trial period.  
38  
39  
40  
41

### 42 **DISCUSSION**

43  
44 Fibromyalgia is a complex chronic condition with high levels of disability, extensive use of  
45  
46 health care services and important impact on patients' quality of life. Current pharmacological  
47  
48 treatments for patients with FM are not curative and initial management should be non-  
49  
50 pharmacological<sup>6</sup>. Patients with FM should be treated in primary health care, but to date the  
51  
52 majority of FM patients are not offered any targeted interventions. This paper describes the  
53  
54 rationale and design of an RCT investigating the effects of a multicomponent community-  
55  
56  
57  
58  
59  
60

1  
2  
3 based rehabilitation programme for patients with FM. The rehabilitation programme will fill a  
4  
5 gap in the management of people with FM and if found effective, can be recommended as a  
6  
7 rehabilitation model for people with FM in primary health care. We aim at reaching patients  
8  
9 at an early stage of their disease to prevent further development of disability and therefore we  
10  
11 will include only patients of 50 years and below. The design of the multicomponent  
12  
13 rehabilitation programme is based on updated international recommendations for management  
14  
15 of FM, including a group-based coping intervention to strengthen patients' health promoting  
16  
17 resources (the VTP) and graded physical exercise<sup>6</sup>. The rationale for offering patients the  
18  
19 VTP before the physical exercise counselling is that many patients may have previous  
20  
21 stressful life experiences and emotional burdens that may be a barrier to behavioural change  
22  
23<sup>39</sup>. Throughout the VTP the participants may acquire alternative coping strategies and more  
24  
25 constructive ways to deal with stress, which may facilitate their participation in physical  
26  
27 activity. The individual physical activity counselling will follow the current practice at the  
28  
29 HLCs and thus ensure the feasibility of the intervention and strengthen the external validity of  
30  
31 the study. The inclusion of patients from both rural and urban communities will also enhance  
32  
33 the generalisability of the results.  
34  
35

36  
37 Some participants may experience the multicomponent rehabilitation programme to be too  
38  
39 comprehensive and recruiting sufficient number of patients may be a challenge. GPs in the  
40  
41 respective municipalities will be approached with information about the project before and  
42  
43 during the study period. Moreover, potential participants will be given extensive information  
44  
45 about the programme before they consent to participate and again before they start the VTP in  
46  
47 order to enhance adherence. Previous research shows that behavioural change takes time and  
48  
49 that interventions that include multiple strategies are more successful<sup>40</sup>. Many patients with  
50  
51 FM express frustration about the lack of treatment possibilities and have felt neglected by the  
52  
53 health care system<sup>41</sup>. They are likely to be motivated to receive any treatment that can  
54  
55  
56  
57  
58  
59  
60

1  
2  
3 improve their condition. Moreover, the Norwegian social security system can provide “sick-  
4  
5 leave for single treatment days” to facilitate participation during work time.

6  
7 The effect of the intervention will be measured in accordance with its aims and content. The  
8  
9 validity of the primary outcome measure, PGIC, has been assessed in a prospective  
10  
11 observational cohort study in FM patients and was found to be a clinically relevant measure to  
12  
13 assess perceived impact of disease management<sup>27</sup>. The secondary outcomes are based on a  
14  
15 recommended core set from OMERACT<sup>24</sup> and thus enable comparison with results from  
16  
17 other studies.

18  
19 The study has been developed in close collaboration with a project group comprising a patient  
20  
21 partner, a rheumatologist, two GPs and a health professional representing rehabilitation  
22  
23 service in one of the communities. If the intervention is proven effective, this group will  
24  
25 contribute to disseminating and implementing the results in clinical practice.  
26  
27

### 28 29 30 **Trial status and publication**

31  
32 Enrolment for the trial began in November 2016 and recruitment is still in progress. Data  
33  
34 collection will continue until the target sample size is reached, approximately December  
35  
36 2018. Results will be published in peer-reviewed scientific journals and communicated to  
37  
38 patients and clinicians in national journals, conferences and social media.  
39  
40  
41  
42  
43  
44  
45  
46  
47  
48  
49  
50  
51  
52  
53  
54  
55  
56  
57  
58  
59  
60

## References

1. Queiroz LP. Worldwide Epidemiology of Fibromyalgia. *Curr Pain Headache Rep.* 2013;**17**(8):356.
2. Kinge JM, Knudsen AK, Skirbekk V, Vollset SE. Musculoskeletal disorders in Norway: prevalence of chronicity and use of primary and specialist health care services. *BMC Musculoskeletal Disorders* 2015;**16**(75).
3. Wolfe F, Clauw DJ, Fitzcharles M-A, Goldenberg DL, Katz RS, Mease P, Russell AS, et al. The American College of Rheumatology Preliminary Diagnostic Criteria for Fibromyalgia and Measurement of Symptom Severity. *Arthritis Care Res.* 2010;**62**(5):600-610.
4. Kool MB, van Middendorp H, Boeije HR, Geenen R. Understanding the lack of understanding: invalidation from the perspective of the patient with fibromyalgia. *Arthritis and rheumatism* 2009;**61**(12):1650-1656.
5. Nuesch E HW, Bernardy K, Barth J, Juni P. Comparative efficacy of pharmacological and non-pharmacological interventions in fibromyalgia syndrom: network meta-analysis. *Ann Rheum Dis.* 2013;**72**:955-962.
6. Macfarlane GJ, Kronisch C, Dean LE, Atzeni F, Hauser W, Fluss E, et al. EULAR revised recommendations for the management of fibromyalgia. *Ann Rheum Dis* 2016;**0**:1-11.
7. The Norwegian Directorate of Health. Muskel- og skjelettsmerter - uten leddhevelser, uten inflammasjonparametre, 2015. [cited 7 Nov 2017]. The Norwegian Directorate of Health; [about 1 screen]. Available from: [https://helsedirektoratet.no/retningslinjer/revmatologi/seksjon?Tittel=muskel-og-skjelettsmerter-9647#muskel--og-skjelettsmerter---uten-leddhevelser,-uten-inflammasjonparametre-\(ikke-rett\)](https://helsedirektoratet.no/retningslinjer/revmatologi/seksjon?Tittel=muskel-og-skjelettsmerter-9647#muskel--og-skjelettsmerter---uten-leddhevelser,-uten-inflammasjonparametre-(ikke-rett)). Norwegian.
8. Kabat-Zinn J: Full Catastrophe Living: Using the Wisdom of Your Body and Mind to Face Stress, Pain and Illness. New York: Delacorte; 2013.
9. Day MA, Jensen MP, Ehde DM, Thorn BE: Toward a theoretical model for mindfulness-based pain management. *J Pain.* 2014;**15**(7):691-703
10. Lauche R, Cramer H, Hauser W, Dobos G, Langhorst J, Fioravanti A: A systematic overview of reviews for complementary and alternative therapies in the treatment of the fibromyalgia syndrome. *Evid Based Complement Alternat Med.* 2015;**2015**:610615. doi:10.1155/2015/610615.
11. Veehof MM, Trompetter HR, Bohlmeijer ET, Schreurs KM: Acceptance- and mindfulness-based interventions for the treatment of chronic pain: a meta-analytic review. *Cogn Behav Ther.* 2016;**45**(1):5-31.
12. Steen E, Haugli L. The body has a history: an educational intervention programme for people with generalised chronic musculoskeletal pain. *Patient Educ Couns* 2000;**41**(2):181-95.
13. Zangi HA, Mowinckel P, Finset A, Eriksson LR, Hoystad TO, Lunde AK, et al: A mindfulness-based group intervention to reduce psychological distress and fatigue in patients with inflammatory rheumatic joint diseases: a randomised controlled trial. *Ann Rheum Dis.* 2012;**71**(6):911-917.
14. Haugli L, Steen E, Laerum E, Nygard R, Finset A: Learning to have less pain - is it possible? A one-year follow-up study of the effects of a personal construct group learning programme on patients with chronic musculoskeletal pain. *Patient Educ Couns.* 2001;**45**(2):111-118.
15. Zangi HA, Finset A, Steen E, Mowinckel P, Hagen KB: The effects of a vitality training programme on psychological distress in patient with inflammatory rheumatic diseases and fibromyalgia: a 1-year follow-up. *Scand J Rheumatol* 2009;**38**:231-234.

16. Zangi HA, Hauge MI, Steen E, Finset A, Hagen KB. "I am not only a disease, I am so much more". Patients with rheumatic diseases' experiences of an emotion-focused group intervention. *Patient Educ Couns* 2011;**85**(3):419-424.
17. Nelson N. Muscle strengthening activities and fibromyalgia: A review of pain and strength outcomes. *J Bodyw Mov Ther*. 2015;**19**(2):370-376.
18. Hauser W, Klose P, Langhorst J, Moradi B, Steinbach M, Schiltenswolf M, et al. Efficacy of different types of aerobic exercise in fibromyalgia syndrome: a systematic review and meta-analysis of randomised controlled trials. *Arthritis Res Ther*. 2010;**12**(3):R79.
19. Denison E, Underland V, Berg R, Vist G: Effects of more than three months organized follow-up on physical activity and diet for people with increased risk of lifestyle related disease. [cited 13 Nov 2017] Nasjonalt kunnskapssenter for helsetjenesten (Kunnskapssenteret), Norwegian Knowledge Centre for the Health Service; 2014. Available from: [https://www.fhi.no/globalassets/kss/filer/filer/publikasjoner/rapporter/20142/rapport\\_2014\\_16\\_frisklivssentraler.pdf](https://www.fhi.no/globalassets/kss/filer/filer/publikasjoner/rapporter/20142/rapport_2014_16_frisklivssentraler.pdf)
20. Lundahl B, Burke BL. The effectiveness and applicability of motivational interviewing: a practice-friendly review of four meta-analyses. *J Clin Psychol*. 2009;**65**(11):1232-45.
21. Craig P, Dieppe P, Macintyre S, Michie S, Nazareth I, Petticrew M. Developing and evaluating complex interventions: the new Medical Research Council guidance. *BMJ* 2008;**337**.
22. Chan A-W, Tetzlaff JM, Altman DG, Dickersin K, Moher D. SPIRIT 2013: new guidance for content of clinical trial protocols. *The Lancet*. 2013;**381**(9861):91-92.
23. Mease PJ, Clauw DJ, Christensen R, Crofford LJ, Gendreau RM, Martin SA, et al. Toward development of a fibromyalgia responder index and disease activity score: OMERACT module update. *J Rheumatol* 2011;**38**(7):1487-1495.
24. Choy EH, Arnold LM, Clauw DJ, Crofford LJ, Glass JM, Simon LS, Martin SA, et al. Content and criterion validity of the preliminary core dataset for clinical trials in fibromyalgia syndrome. *J Rheumatol*. 2009;**36**(10):2330-2334.
25. Beasley M, Prescott GJ, Scotland G, McBeth J, Lovell K, Keeley P, et al. Patient-reported improvements in health are maintained 2 years after completing a short course of cognitive behaviour therapy, exercise or both treatments for chronic widespread pain: long-term results from the MUSICIAN randomised controlled trial. *RMD Open* 2015;**1**(1):e000026. doi:10.1136/rmdopen-2014-000026
26. Richards SC, Scott DL. Prescribed exercise in people with fibromyalgia: parallel group randomised controlled trial. *BMJ* 2002;**325**(7357):185.
27. Rampakakis E, Ste-Marie PA, Sampalis JS, Karellis A, Shir Y, Fitzcharles MA. Real-life assessment of the validity of patient global impression of change in fibromyalgia. *RMD open* 2015;**1**(1):e000146. doi:10.1136/rmdopen-2015-000146
28. Malt UF, Mogstad TE, Refnib IB. Goldberg's General Health Questionnaire. *Tidsskr Nor Laegeforen* 1989;**109**(13):1391-1394. Norwegian.
29. Malt UF. The validity of the General Health Questionnaire in a sample of accidentally injured adults. *Acta Psychiatr Scand Suppl* 355.1989;**80**(103-12).
30. Dundas I, Vøllestad J, Binder P-E, Sivertsen B. The Five Factor Mindfulness Questionnaire in Norway. *Scand J Psychol*. 2013(54):250-260.
31. Baer RA, Smith GT, Hopkins J, Krietemeyer J, Toney L. Using self-report assessment methods to explore facets of mindfulness. *Assessment* 2006;**13**(1):27-45.
32. Herdman M, Gudex C, Lloyd A, Janssen M, Kind P, Parkin D. Development and preliminary testing of the new five-level version of EQ-5D (EQ-5D-5L). *Qual Life Res*. 2011;**20**(10):1727-1736.

- 1  
2  
3 33. Obradovic M, Lal A, Liedgens H. Validity and responsiveness of EuroQol-5 dimension  
4 (EQ-5D) versus Short Form-6 dimension (SF-6D) questionnaire in chronic pain.  
5 *Health Qual Life Outcomes*. 2013;**11**:110.
- 6 34. Solberg TK, Olsen JA, Ingebrigtsen T, Hofoss D, Nygaard OP. Health-related quality of  
7 life assessment by the EuroQol-5D can provide cost-utility data in the field of low-  
8 back surgery. *Eur Spine J*. 2005;**14**(10):1000-1007.
- 9 35. Kurtze N, Rangul V, Hustvedt BE, Flanders WD. Reliability and validity of self-reported  
10 physical activity in the Nord-Trondelag Health Study: HUNT 1. *Scand J Public*  
11 *Health*. 2008;**36**(1):52-61.
- 12 36. Gecht MR, Connell KJ, Sinacore JM, Prohaska TR. A survey of exercise beliefs and  
13 exercise habits among people with arthritis. *Arthritis Care Res*. 1996;**9**(2):82-88.
- 14 37. Reilly MC, Gooch KL, Wong RL, Kupper H, van der Heijde D. Validity, reliability and  
15 responsiveness of the Work Productivity and Activity Impairment Questionnaire in  
16 ankylosing spondylitis. *Rheumatology* 2010;**49**(4):812-819.
- 17 38. The Norwegian Directorate of eHealth. "Norm for informasjonssikkerhet". Oslo: Ministry  
18 of Health and Care Services, 2016. [cited 7 Nov 2017]. Available from:  
19 [https://ehelse.no/Documents/Normen/2%20Normen%20prosessdok/Norm%20for%20i](https://ehelse.no/Documents/Normen/2%20Normen%20prosessdok/Norm%20for%20informasjonssikkerhet%205.2%20%20utgave.pdf)  
20 [nformasjonssikkerhet%205.2%20%20utgave.pdf](https://ehelse.no/Documents/Normen/2%20Normen%20prosessdok/Norm%20for%20informasjonssikkerhet%205.2%20%20utgave.pdf) Norwegian.
- 21 39. Følling IS, Solbjør M, Helvik A-S. Previous experiences and emotional baggage as  
22 barriers to lifestyle change - a qualitative study of Norwegian Healthy Life Centre  
23 participants. *BMC Family Practice* 2015;**16**(1):73.
- 24 40. van Achterberg T, Huisman-de Waal GGJ, Ketelaar NABM, Oostendorp RA, Jacobs JE,  
25 Wollersheim HCH. How to promote healthy behaviours in patients? An overview of  
26 evidence for behaviour change techniques. *Health Promot Int* 2011;**26**(2):148-162.
- 27 41. Kool MB, Geenen R. Loneliness in Patients with Rheumatic Diseases: The Significance  
28 of Invalidation and Lack of Social Support. *J Psychol*. 2012;**146**(1-2):229-241.
- 29  
30  
31  
32  
33  
34  
35  
36  
37  
38  
39  
40  
41  
42  
43  
44  
45  
46  
47  
48  
49  
50  
51  
52  
53  
54  
55  
56  
57  
58  
59  
60

## Footnotes

### Contributors

HAZ, KBH and EB conceived the project idea and designed the study. TH, HAZ and SAP are responsible for recruitment. TH and HAZ are responsible for acquisition of data and data management. TH has drafted the manuscript. HAZ has critically revised the manuscript. SAP, KBH and EB have read and approved the final manuscript.

### Funding

This work was supported by the Norwegian South-Eastern Regional Health Authority (grant number 2016015).

### Competing interests

The authors declare that they have no competing interest.

### Ethics approval

The researchers have obtained approval from the Regional Committee for Medical and Health Research Ethics in South East Norway (2015/2447/REK sørøst A). Written consent to participate will be collected before enrolment to the trial.

### Acknowledgements

The authors would like to thank Aase Frich, Oddfrid Nesse, Ann-Grete Dybvik Akre, Unni Berit Schjervheim, Tove Borgen and Maja Berg Kristoffersen for participation in planning and practical facilitation of the study.



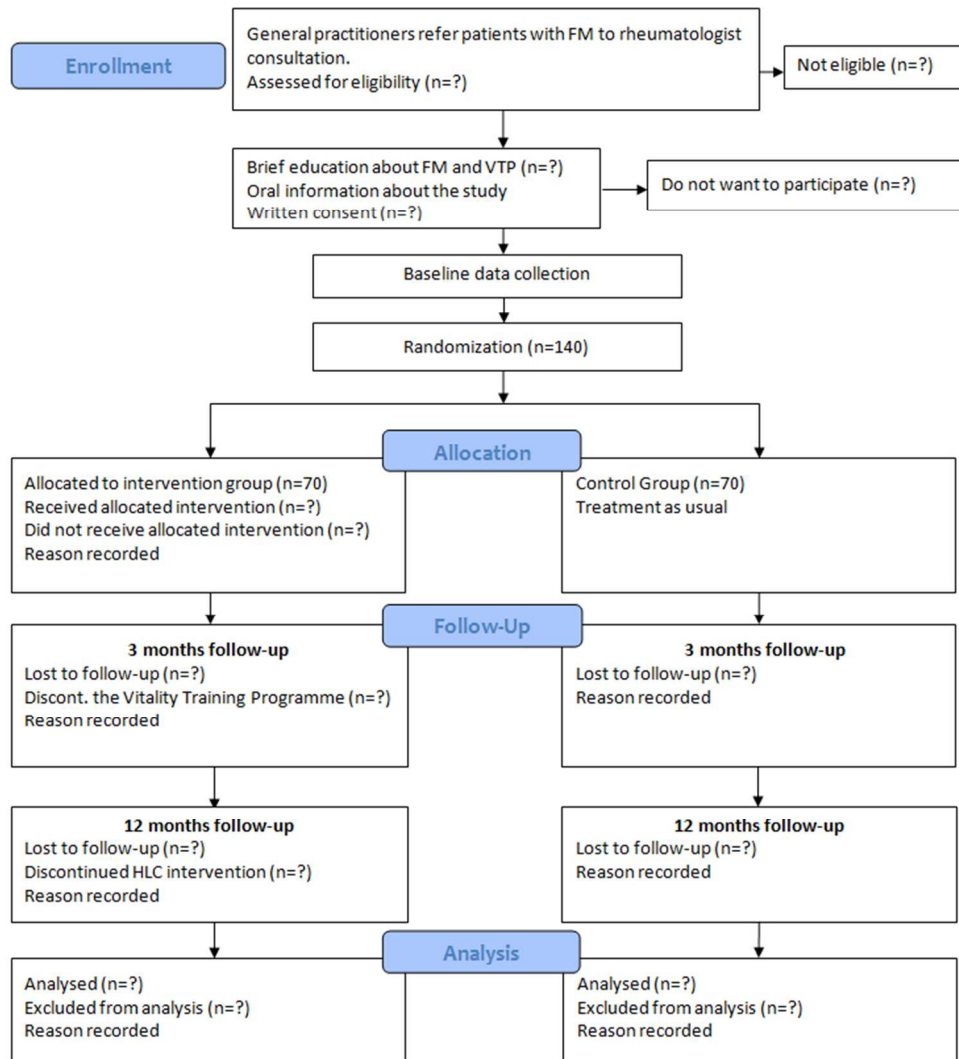

Fig. 1 Study Flow chart

Figure 1. Study Flow chart

201x224mm (96 x 96 DPI)

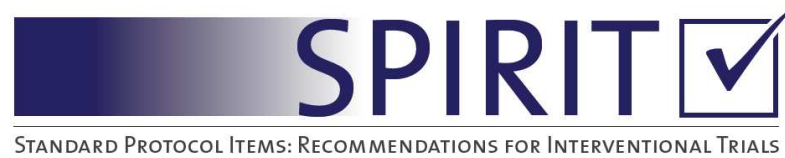

SPIRIT 2013 Checklist: Recommended items to address in a clinical trial protocol and related documents\*

| Section/item                      | Item No | Description                                                                                                                                                                                                                                                                              | Addressed on page number |
|-----------------------------------|---------|------------------------------------------------------------------------------------------------------------------------------------------------------------------------------------------------------------------------------------------------------------------------------------------|--------------------------|
| <b>Administrative information</b> |         |                                                                                                                                                                                                                                                                                          |                          |
| Title                             | 1       | Descriptive title identifying the study design, population, interventions, and, if applicable, trial acronym                                                                                                                                                                             | ___ 1 ___                |
| Trial registration                | 2a      | Trial identifier and registry name. If not yet registered, name of intended registry                                                                                                                                                                                                     | ___ 3 ___                |
|                                   | 2b      | All items from the World Health Organization Trial Registration Data Set                                                                                                                                                                                                                 | ___ NA ___               |
| Protocol version                  | 3       | Date and version identifier                                                                                                                                                                                                                                                              | ___ 3 ___                |
| Funding                           | 4       | Sources and types of financial, material, and other support                                                                                                                                                                                                                              | ___ 19 ___               |
| Roles and responsibilities        | 5a      | Names, affiliations, and roles of protocol contributors                                                                                                                                                                                                                                  | ___ 1 ___                |
|                                   | 5b      | Name and contact information for the trial sponsor                                                                                                                                                                                                                                       | ___ 19 ___               |
|                                   | 5c      | Role of study sponsor and funders, if any, in study design; collection, management, analysis, and interpretation of data; writing of the report; and the decision to submit the report for publication, including whether they will have ultimate authority over any of these activities | ___ NA ___               |
|                                   | 5d      | Composition, roles, and responsibilities of the coordinating centre, steering committee, endpoint adjudication committee, data management team, and other individuals or groups overseeing the trial, if applicable (see Item 21a for data monitoring committee)                         | ___ NA ___               |

1  
2  
3  
4  
5  
6  
7  
8  
9  
10  
11  
12  
13  
14  
15  
16  
17  
18  
19  
20  
21  
22  
23  
24  
25  
26  
27  
28  
29  
30  
31  
32  
33  
34  
35  
36  
37  
38  
39  
40  
41  
42  
43  
44  
45  
46  
47**Introduction**

|                          |    |                                                                                                                                                                                                           |               |
|--------------------------|----|-----------------------------------------------------------------------------------------------------------------------------------------------------------------------------------------------------------|---------------|
| Background and rationale | 6a | Description of research question and justification for undertaking the trial, including summary of relevant studies (published and unpublished) examining benefits and harms for each intervention        | ___ 4 - 8 ___ |
|                          | 6b | Explanation for choice of comparators                                                                                                                                                                     | ___ NA ___    |
| Objectives               | 7  | Specific objectives or hypotheses                                                                                                                                                                         | ___ 7 ___     |
| Trial design             | 8  | Description of trial design including type of trial (eg, parallel group, crossover, factorial, single group), allocation ratio, and framework (eg, superiority, equivalence, noninferiority, exploratory) | ___ 8 ___     |

**Methods: Participants, interventions, and outcomes**

|                      |     |                                                                                                                                                                                                                                                                                                                                                                                |                 |
|----------------------|-----|--------------------------------------------------------------------------------------------------------------------------------------------------------------------------------------------------------------------------------------------------------------------------------------------------------------------------------------------------------------------------------|-----------------|
| Study setting        | 9   | Description of study settings (eg, community clinic, academic hospital) and list of countries where data will be collected. Reference to where list of study sites can be obtained                                                                                                                                                                                             | ___ 8 - 9 ___   |
| Eligibility criteria | 10  | Inclusion and exclusion criteria for participants. If applicable, eligibility criteria for study centres and individuals who will perform the interventions (eg, surgeons, psychotherapists)                                                                                                                                                                                   | ___ 9 ___       |
| Interventions        | 11a | Interventions for each group with sufficient detail to allow replication, including how and when they will be administered                                                                                                                                                                                                                                                     | ___ 11 - 12 ___ |
|                      | 11b | Criteria for discontinuing or modifying allocated interventions for a given trial participant (eg, drug dose change in response to harms, participant request, or improving/worsening disease)                                                                                                                                                                                 | ___ NA ___      |
|                      | 11c | Strategies to improve adherence to intervention protocols, and any procedures for monitoring adherence (eg, drug tablet return, laboratory tests)                                                                                                                                                                                                                              | ___ NA ___      |
|                      | 11d | Relevant concomitant care and interventions that are permitted or prohibited during the trial                                                                                                                                                                                                                                                                                  | ___ 12 ___      |
| Outcomes             | 12  | Primary, secondary, and other outcomes, including the specific measurement variable (eg, systolic blood pressure), analysis metric (eg, change from baseline, final value, time to event), method of aggregation (eg, median, proportion), and time point for each outcome. Explanation of the clinical relevance of chosen efficacy and harm outcomes is strongly recommended | ___ 13 - 14 ___ |
| Participant timeline | 13  | Time schedule of enrolment, interventions (including any run-ins and washouts), assessments, and visits for participants. A schematic diagram is highly recommended (see Figure)                                                                                                                                                                                               | Figure 1 p. 16  |

|   |             |    |                                                                                                                                                                                       |                    |
|---|-------------|----|---------------------------------------------------------------------------------------------------------------------------------------------------------------------------------------|--------------------|
| 1 |             |    |                                                                                                                                                                                       |                    |
| 2 |             |    |                                                                                                                                                                                       |                    |
| 3 | Sample size | 14 | Estimated number of participants needed to achieve study objectives and how it was determined, including clinical and statistical assumptions supporting any sample size calculations | _____ 13 _____     |
| 4 |             |    |                                                                                                                                                                                       |                    |
| 5 | Recruitment | 15 | Strategies for achieving adequate participant enrolment to reach target sample size                                                                                                   | _____ 9 – 10 _____ |
| 6 |             |    |                                                                                                                                                                                       |                    |
| 7 |             |    |                                                                                                                                                                                       |                    |

### 8 **Methods: Assignment of interventions (for controlled trials)**

#### 9 Allocation:

|    |                                  |     |                                                                                                                                                                                                                                                                                                                                                          |                |
|----|----------------------------------|-----|----------------------------------------------------------------------------------------------------------------------------------------------------------------------------------------------------------------------------------------------------------------------------------------------------------------------------------------------------------|----------------|
| 10 |                                  |     |                                                                                                                                                                                                                                                                                                                                                          |                |
| 11 |                                  |     |                                                                                                                                                                                                                                                                                                                                                          |                |
| 12 | Sequence generation              | 16a | Method of generating the allocation sequence (eg, computer-generated random numbers), and list of any factors for stratification. To reduce predictability of a random sequence, details of any planned restriction (eg, blocking) should be provided in a separate document that is unavailable to those who enrol participants or assign interventions | _____ 13 _____ |
| 13 |                                  |     |                                                                                                                                                                                                                                                                                                                                                          |                |
| 14 |                                  |     |                                                                                                                                                                                                                                                                                                                                                          |                |
| 15 |                                  |     |                                                                                                                                                                                                                                                                                                                                                          |                |
| 16 |                                  |     |                                                                                                                                                                                                                                                                                                                                                          |                |
| 17 | Allocation concealment mechanism | 16b | Mechanism of implementing the allocation sequence (eg, central telephone; sequentially numbered, opaque, sealed envelopes), describing any steps to conceal the sequence until interventions are assigned                                                                                                                                                | _____ 13 _____ |
| 18 |                                  |     |                                                                                                                                                                                                                                                                                                                                                          |                |
| 19 |                                  |     |                                                                                                                                                                                                                                                                                                                                                          |                |
| 20 |                                  |     |                                                                                                                                                                                                                                                                                                                                                          |                |
| 21 | Implementation                   | 16c | Who will generate the allocation sequence, who will enrol participants, and who will assign participants to interventions                                                                                                                                                                                                                                | _____ 13 _____ |
| 22 |                                  |     |                                                                                                                                                                                                                                                                                                                                                          |                |
| 23 |                                  |     |                                                                                                                                                                                                                                                                                                                                                          |                |
| 24 | Blinding (masking)               | 17a | Who will be blinded after assignment to interventions (eg, trial participants, care providers, outcome assessors, data analysts), and how                                                                                                                                                                                                                | _____ 13 _____ |
| 25 |                                  |     |                                                                                                                                                                                                                                                                                                                                                          |                |
| 26 |                                  |     |                                                                                                                                                                                                                                                                                                                                                          |                |
| 27 |                                  | 17b | If blinded, circumstances under which unblinding is permissible, and procedure for revealing a participant's allocated intervention during the trial                                                                                                                                                                                                     | _____ NA _____ |
| 28 |                                  |     |                                                                                                                                                                                                                                                                                                                                                          |                |
| 29 |                                  |     |                                                                                                                                                                                                                                                                                                                                                          |                |
| 30 |                                  |     |                                                                                                                                                                                                                                                                                                                                                          |                |

### 31 **Methods: Data collection, management, and analysis**

|    |                         |     |                                                                                                                                                                                                                                                                                                                                                                                                              |                   |
|----|-------------------------|-----|--------------------------------------------------------------------------------------------------------------------------------------------------------------------------------------------------------------------------------------------------------------------------------------------------------------------------------------------------------------------------------------------------------------|-------------------|
| 32 |                         |     |                                                                                                                                                                                                                                                                                                                                                                                                              |                   |
| 33 | Data collection methods | 18a | Plans for assessment and collection of outcome, baseline, and other trial data, including any related processes to promote data quality (eg, duplicate measurements, training of assessors) and a description of study instruments (eg, questionnaires, laboratory tests) along with their reliability and validity, if known. Reference to where data collection forms can be found, if not in the protocol | _____ 12-14 _____ |
| 34 |                         |     |                                                                                                                                                                                                                                                                                                                                                                                                              |                   |
| 35 |                         |     |                                                                                                                                                                                                                                                                                                                                                                                                              |                   |
| 36 |                         |     |                                                                                                                                                                                                                                                                                                                                                                                                              |                   |
| 37 |                         |     |                                                                                                                                                                                                                                                                                                                                                                                                              |                   |
| 38 |                         | 18b | Plans to promote participant retention and complete follow-up, including list of any outcome data to be collected for participants who discontinue or deviate from intervention protocols                                                                                                                                                                                                                    | _____ 17 _____    |
| 39 |                         |     |                                                                                                                                                                                                                                                                                                                                                                                                              |                   |
| 40 |                         |     |                                                                                                                                                                                                                                                                                                                                                                                                              |                   |
| 41 |                         |     |                                                                                                                                                                                                                                                                                                                                                                                                              |                   |
| 42 |                         |     |                                                                                                                                                                                                                                                                                                                                                                                                              |                   |
| 43 |                         |     |                                                                                                                                                                                                                                                                                                                                                                                                              |                   |
| 44 |                         |     |                                                                                                                                                                                                                                                                                                                                                                                                              |                   |
| 45 |                         |     |                                                                                                                                                                                                                                                                                                                                                                                                              |                   |
| 46 |                         |     |                                                                                                                                                                                                                                                                                                                                                                                                              |                   |
| 47 |                         |     |                                                                                                                                                                                                                                                                                                                                                                                                              |                   |

1  
2  
3 Data management 19 Plans for data entry, coding, security, and storage, including any related processes to promote data quality \_\_\_\_\_ 14 \_\_\_\_\_  
4 (eg, double data entry; range checks for data values). Reference to where details of data management  
5 procedures can be found, if not in the protocol  
6  
7 Statistical methods 20a Statistical methods for analysing primary and secondary outcomes. Reference to where other details of the \_\_\_\_\_ 15 - 16 \_\_\_\_\_  
8 statistical analysis plan can be found, if not in the protocol  
9  
10 20b Methods for any additional analyses (eg, subgroup and adjusted analyses) \_\_\_\_\_ NA \_\_\_\_\_  
11  
12 20c Definition of analysis population relating to protocol non-adherence (eg, as randomised analysis), and any  
13 statistical methods to handle missing data (eg, multiple imputation) \_\_\_\_\_ 15 - 16 \_\_\_\_\_  
14  
15 **Methods: Monitoring**  
16  
17 Data monitoring 21a Composition of data monitoring committee (DMC); summary of its role and reporting structure; statement of \_\_\_\_\_ NA \_\_\_\_\_  
18 whether it is independent from the sponsor and competing interests; and reference to where further details  
19 about its charter can be found, if not in the protocol. Alternatively, an explanation of why a DMC is not  
20 needed  
21  
22 21b Description of any interim analyses and stopping guidelines, including who will have access to these interim \_\_\_\_\_ NA \_\_\_\_\_  
23 results and make the final decision to terminate the trial  
24  
25 Harms 22 Plans for collecting, assessing, reporting, and managing solicited and spontaneously reported adverse \_\_\_\_\_ 13 \_\_\_\_\_  
26 events and other unintended effects of trial interventions or trial conduct  
27  
28 Auditing 23 Frequency and procedures for auditing trial conduct, if any, and whether the process will be independent \_\_\_\_\_ NA \_\_\_\_\_  
29 from investigators and the sponsor  
30  
31  
32 **Ethics and dissemination**  
33  
34 Research ethics 24 Plans for seeking research ethics committee/institutional review board (REC/IRB) approval \_\_\_\_\_ 16 \_\_\_\_\_  
35 approval  
36  
37 Protocol 25 Plans for communicating important protocol modifications (eg, changes to eligibility criteria, outcomes, \_\_\_\_\_ NA \_\_\_\_\_  
38 amendments analyses) to relevant parties (eg, investigators, REC/IRBs, trial participants, trial registries, journals,  
39 regulators)  
40  
41  
42  
43  
44  
45  
46  
47

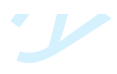

|    |                               |     |                                                                                                                                                                                                                                                                                     |                             |
|----|-------------------------------|-----|-------------------------------------------------------------------------------------------------------------------------------------------------------------------------------------------------------------------------------------------------------------------------------------|-----------------------------|
| 1  |                               |     |                                                                                                                                                                                                                                                                                     |                             |
| 2  |                               |     |                                                                                                                                                                                                                                                                                     |                             |
| 3  | Consent or assent             | 26a | Who will obtain informed consent or assent from potential trial participants or authorised surrogates, and how (see Item 32)                                                                                                                                                        | ___ 9 ___                   |
| 4  |                               |     |                                                                                                                                                                                                                                                                                     |                             |
| 5  |                               |     |                                                                                                                                                                                                                                                                                     |                             |
| 6  |                               | 26b | Additional consent provisions for collection and use of participant data and biological specimens in ancillary studies, if applicable                                                                                                                                               | ___ NA ___                  |
| 7  |                               |     |                                                                                                                                                                                                                                                                                     |                             |
| 8  | Confidentiality               | 27  | How personal information about potential and enrolled participants will be collected, shared, and maintained in order to protect confidentiality before, during, and after the trial                                                                                                | ___ 16 ___                  |
| 9  |                               |     |                                                                                                                                                                                                                                                                                     |                             |
| 10 |                               |     |                                                                                                                                                                                                                                                                                     |                             |
| 11 | Declaration of interests      | 28  | Financial and other competing interests for principal investigators for the overall trial and each study site                                                                                                                                                                       | ___ 19 ___                  |
| 12 |                               |     |                                                                                                                                                                                                                                                                                     |                             |
| 13 |                               |     |                                                                                                                                                                                                                                                                                     |                             |
| 14 | Access to data                | 29  | Statement of who will have access to the final trial dataset, and disclosure of contractual agreements that limit such access for investigators                                                                                                                                     | ___ NA ___                  |
| 15 |                               |     |                                                                                                                                                                                                                                                                                     |                             |
| 16 |                               |     |                                                                                                                                                                                                                                                                                     |                             |
| 17 | Ancillary and post-trial care | 30  | Provisions, if any, for ancillary and post-trial care, and for compensation to those who suffer harm from trial participation                                                                                                                                                       | ___ NA ___                  |
| 18 |                               |     |                                                                                                                                                                                                                                                                                     |                             |
| 19 |                               |     |                                                                                                                                                                                                                                                                                     |                             |
| 20 | Dissemination policy          | 31a | Plans for investigators and sponsor to communicate trial results to participants, healthcare professionals, the public, and other relevant groups (eg, via publication, reporting in results databases, or other data sharing arrangements), including any publication restrictions | ___ 18 ___                  |
| 21 |                               |     |                                                                                                                                                                                                                                                                                     |                             |
| 22 |                               |     |                                                                                                                                                                                                                                                                                     |                             |
| 23 |                               |     |                                                                                                                                                                                                                                                                                     |                             |
| 24 |                               |     |                                                                                                                                                                                                                                                                                     |                             |
| 25 |                               | 31b | Authorship eligibility guidelines and any intended use of professional writers                                                                                                                                                                                                      | ___ NA ___                  |
| 26 |                               |     |                                                                                                                                                                                                                                                                                     |                             |
| 27 |                               | 31c | Plans, if any, for granting public access to the full protocol, participant-level dataset, and statistical code                                                                                                                                                                     | ___ NA ___                  |
| 28 |                               |     |                                                                                                                                                                                                                                                                                     |                             |
| 29 | <b>Appendices</b>             |     |                                                                                                                                                                                                                                                                                     |                             |
| 30 |                               |     |                                                                                                                                                                                                                                                                                     |                             |
| 31 | Informed consent materials    | 32  | Model consent form and other related documentation given to participants and authorised surrogates                                                                                                                                                                                  | NA (available in Norwegian) |
| 32 |                               |     |                                                                                                                                                                                                                                                                                     |                             |
| 33 |                               |     |                                                                                                                                                                                                                                                                                     |                             |
| 34 | Biological specimens          | 33  | Plans for collection, laboratory evaluation, and storage of biological specimens for genetic or molecular analysis in the current trial and for future use in ancillary studies, if applicable                                                                                      | ___ NA ___                  |
| 35 |                               |     |                                                                                                                                                                                                                                                                                     |                             |
| 36 |                               |     |                                                                                                                                                                                                                                                                                     |                             |

37 \*It is strongly recommended that this checklist be read in conjunction with the SPIRIT 2013 Explanation & Elaboration for important clarification on the items.  
 38 Amendments to the protocol should be tracked and dated. The SPIRIT checklist is copyrighted by the SPIRIT Group under the Creative Commons  
 39 "[Attribution-NonCommercial-NoDerivs 3.0 Unported](https://creativecommons.org/licenses/by-nc-nd/3.0/)" license.  
 40

# BMJ Open

## Effects of a community-based multicomponent rehabilitation programme for patients with fibromyalgia: Protocol for a randomised controlled trial

|                                 |                                                                                                                                                                                                                                                                                                                                                                                                                                                                                                                                                                                                                                                       |
|---------------------------------|-------------------------------------------------------------------------------------------------------------------------------------------------------------------------------------------------------------------------------------------------------------------------------------------------------------------------------------------------------------------------------------------------------------------------------------------------------------------------------------------------------------------------------------------------------------------------------------------------------------------------------------------------------|
| Journal:                        | <i>BMJ Open</i>                                                                                                                                                                                                                                                                                                                                                                                                                                                                                                                                                                                                                                       |
| Manuscript ID                   | bmjopen-2017-021004.R1                                                                                                                                                                                                                                                                                                                                                                                                                                                                                                                                                                                                                                |
| Article Type:                   | Protocol                                                                                                                                                                                                                                                                                                                                                                                                                                                                                                                                                                                                                                              |
| Date Submitted by the Author:   | 04-Apr-2018                                                                                                                                                                                                                                                                                                                                                                                                                                                                                                                                                                                                                                           |
| Complete List of Authors:       | Haugmark, Trond; Diakonhjemmet Sykehus AS, Department of Rheumatology: National Advisory Unit on Rehabilitation in Rheumatology Hagen, Kåre Birger ; Diakonhjemmet Sykehus AS, Department of Rheumatology: National Advisory Unit on Rehabilitation in Rheumatology; University of Oslo, Institute of Health and Society, Faculty of Medicine Provan, Sella; Diakonhjemmet Sykehus AS, Department of Rheumatology Bærheim, Elisebeth; Norwegian League Against Rheumatism Zangi, Heidi; Diakonhjemmet Sykehus AS, Department of Rheumatology: National Advisory Unit on Rehabilitation in Rheumatology; VID Specialized University, Faculty of Health |
| <b>Primary Subject Heading</b>: | Rheumatology                                                                                                                                                                                                                                                                                                                                                                                                                                                                                                                                                                                                                                          |
| Secondary Subject Heading:      | Rheumatology                                                                                                                                                                                                                                                                                                                                                                                                                                                                                                                                                                                                                                          |
| Keywords:                       | Fibromyalgia, Rehabilitation, Mindfulness-and acceptance based interventions, Physical activity, Health promotion, Primary health care                                                                                                                                                                                                                                                                                                                                                                                                                                                                                                                |
|                                 |                                                                                                                                                                                                                                                                                                                                                                                                                                                                                                                                                                                                                                                       |

SCHOLARONE™  
Manuscripts

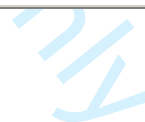

1  
2  
3  
4 **Effects of a community-based multicomponent rehabilitation programme for**  
5 **patients with fibromyalgia: Protocol for a randomised controlled trial**  
6  
7  
8  
9

10  
11 Trond Haugmark<sup>1</sup>, Kåre Birger Hagen<sup>1,2</sup>, Sella Aarrestad Provan<sup>3</sup>, Elisebeth Bærheim<sup>4</sup>, Heidi  
12  
13 A. Zangi<sup>1,5</sup>  
14  
15

16  
17 **Author details**  
18

19  
20 <sup>1</sup>National Advisory Unit on Rehabilitation in Rheumatology, Department of Rheumatology,  
21  
22 Diakonhjemmet Hospital, PO Box 23 Vinderen, N-0319 Oslo, Norway  
23

24 <sup>2</sup>Institute of Health and Society, Faculty of Medicine, University of Oslo, Norway  
25

26 <sup>3</sup>Department of Rheumatology, Diakonhjemmet Hospital, Oslo, Norway  
27

28 <sup>4</sup>Norwegian League Against Rheumatism, Oslo, Norway  
29

30 <sup>5</sup>Faculty of Health, VID Specialized University, Oslo, Norway  
31  
32  
33

34  
35 **Corresponding author:**  
36

37 Trond Haugmark<sup>1</sup>: National Advisory Unit on Rehabilitation in Rheumatology, Department of  
38  
39 Rheumatology, Diakonhjemmet Hospital, PO Box 23 Vinderen, N-0319 Oslo, Norway  
40

41 Phone number: +47 95130795      Telefax: +47 22 45 48 50  
42

43 E-mail: [trond.haugmark@diakonsyk.no](mailto:trond.haugmark@diakonsyk.no)  
44  
45  
46  
47

48 **Keywords:** fibromyalgia, rehabilitation, primary health care, mindfulness- and acceptance  
49  
50 based interventions, physical activity, health promotion  
51  
52  
53  
54  
55  
56  
57



## Abstract

**Introduction** People with fibromyalgia suffer from symptoms such as widespread pain, non-refreshing sleep, fatigue and reduced quality of life. Effects of pharmacological treatment are questionable and non-pharmacological treatments are recommended as first-line therapy. To date the majority of fibromyalgia patients in Norway are not offered any targeted treatment. The aim of this randomised controlled trial is to investigate the effects of a community-based multicomponent rehabilitation program comprising an acceptance- and mindfulness-based group intervention, the Vitality Training Programme (VTP), followed by tailored physical activity counselling.

**Materials and methods** General practitioners refer potential participants to a rheumatologist in specialist health care for diagnostic clarification and assessment of comorbidities. Inclusion criteria are widespread pain/fibromyalgia  $\geq$  three months, age 20 to 50 and work participation (minimum part-time) within the last two years. The intervention group attends the VTP comprising ten weekly four-hour group sessions plus a booster session after six months. Thereafter, they receive twelve weeks of individually tailored physical exercise counselled by physiotherapists at community-based Healthy Life Centers. The control group follows treatment as usual. The primary outcome is Patient Global Impression of Change. Secondary outcomes include self-reported pain, fatigue and sleep quality, psychological distress, mindfulness, health-related quality of life, physical activity, work ability and exercise beliefs and habits. To achieve a power of 80 % and allow for 10 % dropout, 70 participants are needed in each arm. All analyses will be conducted on intention-to-treat bases and measured as differences between groups at 12 months follow-up.

**Ethics and dissemination** The study is approved and granted by the Norwegian South-Eastern Regional Health Authority (reference 2016015). Ethics approval was obtained from Regional Committee for Medical and Health Research Ethics (reference 2015/2447/REK sør-

1  
2  
3 øst A). Results will be submitted to appropriate journals and presented in relevant conferences  
4  
5 and social media.

6  
7 **Trial registration** ISRCTN 96836577. Registered 12 July 2016.  
8  
9

## 10 11 **Strengths and limitations of the study** 12 13

- 14  
15 • The multicomponent rehabilitation programme consists of modalities that have  
16  
17 previously been found to be effective for people with rheumatic and musculoskeletal  
18  
19 diseases.  
20
- 21 • Sustainability of effects will be measured at one year follow-up.  
22
- 23 • The inclusion of patients from both rural and urban communities will enhance the  
24  
25 generalisability of the results.  
26
- 27 • It is not possible to examine the effectiveness of single components of the programme.  
28  
29
- 30 • Some participants may experience the multicomponent rehabilitation programme to be  
31  
32 too comprehensive and time-consuming.  
33  
34  
35  
36  
37  
38  
39  
40  
41  
42  
43  
44  
45  
46  
47  
48  
49  
50  
51  
52  
53  
54  
55  
56  
57  
58  
59  
60

## Introduction

Fibromyalgia (FM) is a heterogeneous and still unexplained disease that poses major personal and societal challenges in terms of disease burden, non-fatal health loss and costs<sup>1 2</sup>. It is one of the most common chronic pain conditions with an estimated prevalence of 2 % worldwide<sup>3</sup>. In Norway, it is estimated that FM affects as much as 6 % of the women and 3 % of the men<sup>4</sup>. The cardinal symptom of FM is widespread pain characterised by reduced pressure pain thresholds and hyperalgesia. In 2010 the American College of Rheumatology (ACR) introduced new diagnostic criteria that also included other somatic symptoms, such as non-refreshing sleep, fatigue, difficulties with memory and concentration, irritable bowel syndrome, headache and depression<sup>5</sup>. The complexity of FM symptoms commonly reduces patients' wellbeing and has an important influence on their quality of life<sup>6</sup>. In Norway FM is a common cause of sick leave, disability benefit and extensive use of health care services<sup>4</sup>. Although the FM diagnosis has become increasingly recognised during the last decades, there are still some physicians who question its validity. Several patients experience disbelief, lack of understanding and stigmatisation from their general practitioners (GPs) as well as from the social security systems, colleagues and family<sup>3 7</sup>.

Current treatments for FM are non-curative and the efficacy of pharmacological treatment alone is questionable<sup>8</sup>. Recent updated evidence-based recommendations from the European League Against Rheumatism (EULAR) conclude that optimal management requires prompt diagnosis and thereafter a graduated follow-up<sup>9</sup>. The initial management of FM should focus on patient education and non-pharmacological interventions, such as graded physical exercise and individually tailored psychological therapies for those with mood disorder or unhelpful coping strategies. The interventions may be combined in multicomponent rehabilitation programmes. Pharmacotherapy is only recommended for severe pain and sleep disturbances<sup>9</sup>.

1  
2  
3 In Norway the main responsibility for management of FM is assigned to the primary health  
4 care services<sup>10</sup>. Some FM patients are referred to physiotherapists and a few to rehabilitation  
5 in specialist care. However, to date, the majority of FM patients are not offered any tailored  
6 treatment in the primary health care.  
7  
8  
9  
10

### 11 12 13 **Mindfulness- and acceptance-based training for FM patients**

14  
15  
16 It has been shown that women with FM may have maladaptive emotion regulation styles, such  
17 as difficulty in identifying and expressing feelings, which amplify pain and impede their  
18 adjustment to the disease. Moreover, women with FM commonly experience stressful and  
19 negative emotions related to depressive mood and anxiety<sup>11 12</sup>. In mindfulness- and  
20 acceptance-based therapies participants learn to accept their experiences of pain and stressful  
21 thoughts and emotions as part of human life that one can relate to rather than judging them as  
22 good or bad, positive or negative, and thus fostering better emotional regulation<sup>13</sup>. The core  
23 aspect of mindfulness is training in moment-to-moment awareness of internal experiences,  
24 such as thoughts, emotions and body sensations with an attitude of openness, curiosity,  
25 patience and acceptance<sup>14</sup>. Increased acceptance is believed to decrease the struggle to  
26 control what might not be controllable and seems to be associated with better treatment  
27 outcomes for pain patients<sup>15</sup>. Systematic reviews on mindfulness training for patients with  
28 FM have shown evidence for small, but significant improvements of pain, depression, anxiety  
29 and quality of life<sup>16 17</sup>.  
30  
31  
32  
33  
34  
35  
36  
37  
38  
39  
40  
41  
42  
43  
44  
45  
46

47 A Norwegian mindfulness- and acceptance-based group intervention, the Vitality Training  
48 Programme (VTP) was developed for patients with chronic musculoskeletal pain in the late  
49 1990s<sup>18</sup>. It was later adjusted for patients with inflammatory arthritis (IA)<sup>19</sup>. The VTP  
50 incorporates mindfulness training, values-based action and various creative methods. The  
51 main goals are to enhance participants' awareness of their health promoting resources and to  
52  
53  
54  
55  
56  
57

1  
2  
3 strengthen their inner authority and abilities to make conscious choices in line with their  
4  
5 personal values. Two randomized controlled trials on the VTP, one in patients with chronic  
6  
7 musculoskeletal pain, including FM, and one in patients with IA, showed reduced  
8  
9 psychological distress, improved pain coping and mental well-being in the intervention  
10  
11 groups compared to the control groups. The group with IA also showed decreased fatigue and  
12  
13 increased self-efficacy. The effects were sustained or increased at one year follow-up<sup>19 20</sup>.  
14  
15 However, a longitudinal pre-post-test study on the VTP in patients with IA and FM showed  
16  
17 substantial improvements in the IA group, but no changes in the FM group<sup>21</sup>. The reason for  
18  
19 these differences remains unclear, but it may be related to the long symptoms duration  
20  
21 without any targeted treatment in the FM patients. On average, these patients had experienced  
22  
23 pain symptoms more than 10 years before they were diagnosed with FM. Living with pain  
24  
25 over many years without access to relevant treatment might lead to development of  
26  
27 maladaptive coping strategies that may be difficult to change. Hence, it was suggested that  
28  
29 future studies should investigate effects of the VTP in FM patients with more recent disease  
30  
31 onset<sup>21 22</sup>. The VTP is implemented in some rheumatology specialist departments and in  
32  
33 specialist rehabilitation, but to date there is no systematic implementation and evaluation in  
34  
35 primary health care.  
36  
37  
38  
39  
40  
41

## 42 **Physical exercise for FM patients**

43  
44 Physical exercise has been defined as physical activity that is planned, structured, and  
45  
46 repetitive with the goal to maintain or improve physical fitness, i.e. cardiorespiratory  
47  
48 endurance, muscular strength and flexibility<sup>23</sup>. Studies have demonstrated that compared to  
49  
50 healthy women people with FM are less physically active<sup>24</sup>. Two systematic reviews on  
51  
52 physical exercise in FM patients found evidence that aerobic exercise reduces pain, fatigue  
53  
54 and depressed mood and improves health-related quality of life and physical fitness<sup>25 26</sup>. The  
55  
56  
57

1  
2  
3 amount and intensity of initial aerobic exercises should be adapted to the individual level of  
4  
5 physical fitness and patients should start at a level just below their capacity and gradually  
6  
7 increase the duration and intensity<sup>25</sup>. Studies have demonstrated that appropriately progressed  
8  
9 muscle strengthening activities is safe and effective for individuals with FM and should be  
10  
11 considered as part of a multicomponent rehabilitation programme<sup>26</sup>.  
12

13  
14 Since 2004, Healthy Life Centres (HLC) have been established in most Norwegian  
15  
16 municipalities<sup>27</sup>. The HLCs are based on a salutogenic framework aiming at strengthening  
17  
18 peoples' capacities to use their own health resources and make health-friendly choices. They  
19  
20 provide low-threshold easily accessible activities and interventions targeted at supporting  
21  
22 behavioural changes and management of lifestyle issues, such as indoor and outdoor physical  
23  
24 activity, healthy diet courses, smoking cessation and short mental health interventions. The  
25  
26 physical activity interventions include aerobic and strengthening exercises usually twice a  
27  
28 week for a 12-week period. Some HLCs also offer yoga and mindfulness exercises. Health  
29  
30 professionals working at HLCs are mainly physiotherapists and nutritionists. All are educated  
31  
32 in Motivational interviewing (MI), which is both a treatment philosophy and a set of methods  
33  
34 employed to help people increase intrinsic motivation by exploring and resolving ambivalence  
35  
36 about behavioural change. MI has demonstrated effectiveness for clients regardless of  
37  
38 problem severity, age, and gender<sup>28</sup>. One of the main groups that utilise HLCs is people with  
39  
40 chronic pain condition, including FM. However, many FM patients are reluctant to  
41  
42 participate in the general exercises because they are afraid of increasing their pain. For FM  
43  
44 patients it seems to be important that the exercise programmes are individually tailored and  
45  
46 that the graded approach is followed.  
47  
48  
49  
50  
51  
52

### 53 **Aim and research questions**

54  
55  
56  
57  
58  
59  
60

1  
2  
3 The overall aim of this trial is to evaluate the effects of a multicomponent rehabilitation  
4 programme for patients with newly diagnosed FM delivered in primary health care.

5  
6  
7 The primary objective is to study the hypothesis that patients with newly diagnosed FM who  
8 participate in a community-based multicomponent rehabilitation programme will improve  
9 their self-perceived health compared to patients who follow their “treatment as usual”. The  
10 rehabilitation programme comprises the VTP plus 12 weeks physical activity counselling at a  
11 HCL.  
12  
13  
14  
15  
16  
17

18 More specifically, the study will investigate the following research questions:  
19

- 20  
21 1. Does a community-based multicomponent rehabilitation programme relieve newly  
22 diagnosed FM patients’ symptoms burden in terms of reduced pain, fatigue, sleep  
23 disturbances and psychological distress?  
24  
25  
26
- 27 2. Does a community-based multicomponent rehabilitation programme increase FM  
28 patients’ physical activity?  
29  
30  
31
- 32 3. Does a community-based multicomponent rehabilitation programme increase newly  
33 diagnosed FM patients’ work ability?  
34  
35  
36  
37

### 38 **Trial development and design**

39  
40 A project group including a patient representative, two GPs, a representative for community  
41 rehabilitation service, a rheumatologist and health professionals educated as VTP facilitators  
42 have been involved in the project development and will be consulted throughout the trial. The  
43 study is a pragmatic parallel randomised controlled trial with two arms (ISRCTN 96836577).  
44  
45 The multicomponent rehabilitation programme is a complex intervention with several  
46 interacting components, such as a group intervention with several interactive methods plus  
47 individually tailored physical exercise counselling. The project group has followed the new  
48 Medical Research Council guidance for Developing and evaluating complex interventions<sup>29</sup>.  
49  
50  
51  
52  
53  
54  
55  
56  
57

1  
2  
3 The protocol has been developed in line with the SPIRIT guidelines (Standard Protocol Items:  
4 Recommendations for Interventional Trials)<sup>30</sup> (Online Supplementary file 1).  
5  
6  
7  
8

## 9 10 **Methods**

### 11 12 **Study setting and recruitment of participants**

13  
14 The trial is a collaboration between the rheumatology specialist department at Diakonhjemmet  
15 Hospital in Oslo, two municipal districts in the city of Oslo and six rural municipalities in  
16 geographical proximity to Oslo. GPs and physiotherapists in the eight municipalities will  
17 identify potential patients and refer the patients to a rheumatologist at Diakonhjemmet  
18 Hospital for diagnosis clarification and assessment of comorbidities. To enhance recruitment  
19 the project coordinator (TH) and the project leader (HAZ) have visited all GP offices in the  
20 eight municipalities and written information is sent by e-mail and per post. Moreover, flyers  
21 have been distributed to offices and waiting areas for potential patients informing them to  
22 contact their GP if they are in the target group for the project. Information is also shared in  
23 relevant website and social media.  
24  
25

26 Patients will be examined and screened for eligibility by the rheumatologist. All eligible  
27 patients will be offered a three-hour FM group education programme by a rheumatologist and  
28 a nurse, aimed at providing basic understanding about FM, pain mechanisms, psychological  
29 factors, physical activity and coping strategies. Short mindfulness and yoga exercises will be  
30 introduced. This programme is currently part of standard care for FM patients at  
31 Diakonhjemmet Hospital. Additionally, the project coordinator will inform about the VTP and  
32 present the logistics of the study. The patients have the opportunity to ask questions before  
33 they consent to participate. The programme will be arranged regularly throughout the  
34 recruitment period until the target sample size is obtained.  
35  
36  
37  
38  
39  
40  
41  
42  
43  
44  
45  
46  
47  
48  
49  
50  
51  
52  
53  
54  
55  
56  
57  
58  
59  
60



1  
2  
3 The multicomponent rehabilitation programme will be conducted in the municipalities. HAZ  
4 and TH will organise the VTP at central places in Oslo and the rural municipalities. The  
5 physical exercise will take place at a HCL in the participants' home communities. If the  
6 community has not yet established a HCL the participants will be referred to a HCL in a  
7 nearby community. Participants will follow the HCL's ordinary 12-week physical activity  
8 counselling and exercise programme (Figure 1).  
9  
10  
11  
12  
13  
14  
15

### 16 17 18 **Eligibility criteria**

19  
20 Patients are eligible for inclusion if they are diagnosed with FM according to the ARC 2010  
21 criteria for fibromyalgia <sup>5</sup> and aged between 20 and 50 years. Patients will be excluded if they  
22 have a comorbid inflammatory rheumatic disease, have been out of work for more than two  
23 years due to their pain condition, have a serious psychiatric disorder, have another disease that  
24 does not allow physical exercise, or are unable to understand and write Norwegian.  
25  
26  
27  
28  
29  
30  
31  
32

### 33 **Interventions**

#### 34 35 ***The Vitality Training Program***

36  
37  
38 The VTP comprises ten weekly four-hour group sessions plus a booster session after about six  
39 months. Each group have between eight and twelve participants. Every session addresses a  
40 specific topic related to living with long-lasting health challenges: If my body could talk/  
41 Who am I?/ Values – what is important to me?/ What do I need?/ Strengths & limitations/ Bad  
42 conscience/ Anger/ Joy/ Resources, potentials and choices/ The way ahead <sup>18 19</sup> (Online  
43 Supplementary file 2). The participants are invited to explore these topics by using various  
44 creative methods, such as guided imagery, music, drawing, poetry and metaphors. The  
45 purpose is to provide opportunities for personal discoveries by intentionally attending to  
46 emotional, cognitive and bodily experiences. Participants are also invited to write logs from  
47  
48  
49  
50  
51  
52  
53  
54  
55  
56  
57

1  
2  
3 all exercises and to share their experiences and discoveries with other group participants.  
4  
5 Moreover, participants are invited to attend to mindfulness meditation exercises, i.e. body  
6  
7 scan, sitting and walking meditation and breathing exercises. They are provided with guided  
8  
9 mindfulness audio files and are encouraged to practice these exercises in everyday life and to  
10  
11 train awareness in daily activities. Moreover, the VTP includes gentle yoga exercises that can  
12  
13 help participants explore their physical boundaries and overcome barriers to movement.  
14  
15 Throughout the programme participants learn how to balance rest with activity, identify  
16  
17 activities that are important and healthful to them, and how to overcome barriers to prioritise  
18  
19 these activities (values-based action).  
20  
21

22  
23 All groups have two facilitators who are certified through a one-year university training  
24  
25 programme (30 crd) at VID Specialized University in Oslo. They follow a manual with a  
26  
27 thorough program description<sup>18</sup>. Adherence to the intervention, i.e. attendance in group  
28  
29 sessions will be recorded by the group facilitators. The participants need to attend at least 50  
30  
31 % of the sessions to expect effect. They will also be asked to report any adverse events  
32  
33 (Online Supplementary 3).  
34  
35

### 36 ***Individual physical activity counselling and tailored physical exercise***

37  
38 After completing the VTP, participants will be offered individual physical activity counselling  
39  
40 by a physiotherapist at the HLCs. Interviews based on MI with focus on individual planning  
41  
42 and goalsetting on activity and participation level will be conducted before start-up, after six  
43  
44 weeks and at the end of week 12. The goals will be defined by the participant in collaboration  
45  
46 with a physiotherapist. A common goal may be to reduce pain. An activity plan may be to  
47  
48 perform strengthening and aerobic exercises, for example cycling or Nordic walking three  
49  
50 times a week. Another aim is to learn the balance between activity and rest and find the right  
51  
52 dosage of the exercises. The purpose of the counselling is to help participants identify and  
53  
54 overcome barriers to physical activity, to find exercises that can be easily continued in their  
55  
56  
57  
58  
59  
60

1  
2  
3 everyday life and gradually increase their levels of physical activity. The physical exercise  
4  
5 will be adapted to each participant's individual level of physical fitness. The physiotherapists  
6  
7 will record adherence to the HLC intervention and any adverse events during the 12-week  
8  
9 period.

### 10 11 12 **Control group**

13  
14 Patients randomised to the control group will not receive any intervention other than the  
15  
16 three-hour FM education. They will follow their "treatment as usual" in primary care, i.e. GP  
17  
18 consultations and any physical activity they may choose. At the FM course all participants are  
19  
20 told that they can follow any new information as they would like. This means that control  
21  
22 group participants may initiate life-style changes on their own initiative. There are no  
23  
24 restrictions on participation in physical activities during the trial. The control group will be  
25  
26 offered the VTP after completion of the last data collection, i.e. one year after inclusion.  
27  
28  
29  
30

### 31 32 **Outcomes**

33  
34 Outcome measures are selected according to the core set of domains for FM defined by the  
35  
36 Outcome Measures in Rheumatology Clinical Trials (OMERACT)<sup>31 32</sup>. All outcomes are  
37  
38 self-reported.  
39

40  
41 **Primary outcome** will be Patient Global Impression of Change (PGIC) that evaluates overall  
42  
43 health status as perceived by the patient in a 7-point single-item scale ranging from 1 ("I feel  
44  
45 very much worse") through 4 ("no change") to 7 ("I feel very much better") one year after  
46  
47 inclusion<sup>33</sup>. Scores of 6 and 7 are considered clinically relevant improvement<sup>34</sup>. This measure  
48  
49 has previously been used in FM trials<sup>33 35 36</sup>.

50  
51 **Secondary outcomes** related to the specific research questions will be collected at baseline, 3  
52  
53 and 12 months. The outcomes include:  
54  
55  
56  
57

- 1  
2  
3  
4  
5  
6  
7  
8  
9  
10  
11  
12  
13  
14  
15  
16  
17  
18  
19  
20  
21  
22  
23  
24  
25  
26  
27  
28  
29  
30  
31  
32  
33  
34  
35  
36  
37  
38  
39  
40  
41  
42  
43  
44  
45  
46  
47  
48  
49  
50  
51  
52  
53  
54  
55  
56  
57  
58  
59  
60
- *Pain, fatigue and sleep quality* assessed by Numerical Rating Scales (NRS) scored from 0 - 10 (10 is intolerable pain/fatigue/very bad sleep quality).
  - *Psychological distress* assessed by the General Health Questionnaire-12 (GHQ-12), a widely used screening instrument measuring aspects of psychological health during the last two weeks<sup>37</sup>. The GHQ-12 comprises six positively phrased items, indicating psychological health, and six negatively phrased items, indicating psychological distress. The respondents are requested to compare their current status with what they consider as their “normal” condition on a four point Likert scale, scored from 0 (less than usual) to 3 (much more than usual). This gives a possible sum score between 0 (no distress at all) and 36 (much more distress than usual)<sup>37 38</sup>.
  - *Mindfulness* assessed by The Five Factor Mindfulness Questionnaire (FFMQ) that measures a general tendency to be mindful in daily life. FFMQ comprises 39 items rated on a five-point Likert scale from 1 (never or very rarely true) to 5 (always or almost always true)<sup>39 40</sup>.
  - *Health-related quality of life* assessed by the EuroQol (EQ-5D-5 L) comprising five dimensions of mobility, self-care, usual activities, pain/ discomfort and anxiety/ depression. Each dimension is scored on five levels: no problems, slight problems, moderate problems, severe problems and extreme problems. Additionally, “perceived health today” is scored from 0 (as bad as it could be) to 100 (as good as it could be)<sup>41</sup>. The instrument has been validated in similar populations<sup>42</sup> and in Norwegian context<sup>43</sup>.
  - *Physical activity* assessed by three questions addressing the average number of times exercising each week, and the average intensity and average duration each week<sup>44</sup>.
  - *Motivation and barriers for physical activity* assessed by the Exercise Beliefs and Exercise Habits questionnaire comprising twenty items that reflect beliefs about one’s ability to exercise, barriers to exercise, benefits of exercise, and impact of exercise on

1  
2  
3 muscular pain. Items are scored on a five-point Likert scale, ranging from strongly agree  
4  
5 to strongly disagree<sup>45</sup>.

- 6  
7 • *Work ability* assessed by the Work Productivity and Activity Impairment General Health  
8  
9 version 2.1 (WPAI:GH) that comprises six questions to determine employment status,  
10  
11 hours missed from work because of health problems or other reasons, hours actually  
12  
13 worked, the degree to which health problems affected work productivity while at work  
14  
15 and activities outside of work<sup>46</sup>. WPAI outcomes are expressed as impairment  
16  
17 percentages with higher numbers indicating greater impairment and less productivity.  
18  
19

20 Moreover, the data collection includes self-reported health care consumption, i.e. visits to GP,  
21  
22 rheumatologist, physiotherapist and other health care professionals, use of medication and  
23  
24 alternative treatments. Self-reported adverse events will be collected electronically at 12  
25  
26 months. The respondents report if they have or have not experienced any adverse events. If  
27  
28 relevant, the respondents report whether they perceived the events caused by the VTP or the  
29  
30 HLC intervention with the possibility to elaborate (Online Supplementary file 3).  
31  
32  
33  
34

### 35 **Sample size**

36  
37 Sample size calculation is based on the primary outcome assuming that 10 % in the control  
38  
39 group will report that they “feel much better” or “very much better” after 12 months<sup>35</sup> and  
40  
41 that at least a 20 % absolute difference in improvement rate between the groups can be  
42  
43 considered as a minimal clinically relevant difference. We anticipate 10 % losses to follow-up  
44  
45 and will need 70 participants in each group to have at least 80 % power of detecting  
46  
47 differences with 5 % alpha level.  
48  
49  
50  
51

### 52 **Randomisation and allocation concealment**

53  
54  
55  
56  
57

1  
2  
3 A statistician has generated an electronic randomisation list based on blocks of 20 to 24 for  
4 each geographical area to ensure approximately equal sample sizes. Participants will be given  
5 consecutive numbers. A secretary not involved in the data collection or the intervention will  
6 allocate each participant to the corresponding number on the randomisation list and inform the  
7 patients about group allocation by telephone and written letter. Due to the nature of the  
8 implementation strategy it is not possible to blind the patients or the health professionals. The  
9 project leader and the research coordinator who are responsible for the data collection and  
10 data analyses will not be aware of group allocation.  
11  
12  
13  
14  
15  
16  
17  
18  
19  
20  
21

### 22 **Data collection**

23  
24 Participant flow is shown in Figure 1. Data will be collected electronically by a solution  
25 delivered by Infopad ([www.infopad.no](http://www.infopad.no)) before randomisation (baseline), after the VTP (3  
26 months), and at 12-months from baseline. This electronic solution is risk evaluated and  
27 follows the Code of Conduct for information security in the health care and care services<sup>47</sup>.  
28  
29 Participants will be registered in the electronic system by the project coordinator. Participants  
30 receive an e-mail with a unique link to the questionnaire at each assessment point and can  
31 respond to the questionnaire on their individual electronic device (computer, mobile phone or  
32 tablet). Participants who do not possess an electronic device will receive a paper version of  
33 the questionnaire.  
34  
35  
36  
37  
38  
39  
40  
41  
42  
43  
44  
45

### 46 **Statistical analysis**

47  
48 The treatment effects will be analysed on an intention-to-treat basis with all randomised  
49 participants retaining their original allocated group and measured as differences between  
50 groups at 12 months. Analyses of covariance (ANCOVA) will be used for continuous  
51 outcomes with baseline values as covariates. Logistic regression analyses for dichotomous  
52  
53  
54  
55  
56  
57  
58  
59  
60

1  
2  
3 outcomes. The level of significance will be set to  $p \leq 0.05$  and the confidence level to 95 %.

4  
5 We will use the STATA 14.0 (Texas, USA) to analyse the data.  
6  
7

## 8 9 **Ethical approval**

10  
11 Study design, information strategy, written consent formula, and data security are approved  
12  
13 by the Regional Committee for Medical and Health Research Ethics (2015/2447/REK sør-øst  
14  
15 A). The trial will be carried out in accordance with the Helsinki Declaration. Participants will  
16  
17 receive written and oral information about the study processes and interventions before they  
18  
19 sign a written declaration of voluntary participation. They have the right to withdraw from the  
20  
21 study at any time without any explanation.  
22  
23

24  
25 All included participants will receive a consultation with a rheumatologist and a brief patient  
26  
27 education intervention that either corresponds to or is better than their currently provided care.  
28  
29 Participants who are randomised to the multicomponent rehabilitation programme will receive  
30  
31 a potentially more effective intervention. Control group participants will receive the current  
32  
33 standard of care that is delivered in their respective community. Thus, no participants will  
34  
35 receive an intervention that is below standard treatment. Any potential adverse events will be  
36  
37 registered throughout the trial period. All personal information about potential and enrolled  
38  
39 patients as well as patient consent forms will be securely stored in paper formats in a locked  
40  
41 closet in a locked room. Electronical data will be stored in a password protected solution  
42  
43 ([www.infopad.no](http://www.infopad.no)) during the study and for five years after completion. The project leader  
44  
45 (HAZ) will regularly review the data collection process, and ensure that the data are collected,  
46  
47 stored and handled in accordance with the current guidelines. The data are only available to  
48  
49 the project leader (HAZ), the project coordinator (TH) and the project secretary.  
50  
51  
52  
53  
54

## 55 **Patient and Public Involvement**

56  
57  
58  
59  
60

1  
2  
3 The VTP was developed in the 1990s in close collaboration with people with chronic  
4 musculoskeletal pain<sup>18</sup>. The burden of the intervention has been assessed in the two previous  
5 randomised controlled trials<sup>18 22</sup>. The present project emerged from informal conversations  
6  
7 between the project manager (KBH), the project leader (HAZ) and the leader of the FM group  
8  
9 in the Norwegian Rheumatism Association (EB). Further development of the project, such as  
10  
11 study design, research questions and recruitment of patients has been thoroughly discussed  
12  
13 with representatives for the Patient Advisory Board at the rheumatology department at  
14  
15 Diakonhjemmet Hospital. The electronic questionnaire has been tested and amended by user  
16  
17 representatives.  
18  
19

20  
21  
22 In addition to publishing in international peer-reviewed journals, the results of the study will  
23  
24 be disseminated through various information channels to the project group members and the  
25  
26 public, including web-sites, social media, national and international networks, conferences  
27  
28 and congresses. Moreover, the results will be published in a yearly special issue of the journal  
29  
30 of the Norwegian Rheumatism Association that focuses on recent research and communicated  
31  
32 to patients in relevant meetings arranged by this association.  
33  
34  
35  
36

## 37 **DISCUSSION**

38  
39  
40 Fibromyalgia is a complex chronic condition with extensive use of health care services and  
41  
42 important impact on patients' quality of life. Current pharmacological treatments for patients  
43  
44 with FM are not curative and initial management should be non-pharmacological<sup>9</sup>. Patients  
45  
46 with FM should be treated in primary health care, but to date the majority of FM patients are  
47  
48 not offered any targeted interventions. This paper describes the rationale and design of an  
49  
50 RCT investigating the effects of a multicomponent community-based rehabilitation  
51  
52 programme for patients with FM. The rehabilitation programme will fill a gap in the  
53  
54 management of people with FM and if found effective, can be recommended as a  
55  
56  
57



1  
2  
3 rehabilitation model for people with FM in primary health care. We aim at reaching patients  
4  
5 at an early stage of their disease to prevent further development of disability and therefore we  
6  
7 will include only patients of 50 years and below, and patients who have not been out of work  
8  
9 for more than two years due to their pain condition. The design of the multicomponent  
10  
11 rehabilitation programme is based on updated international recommendations for management  
12  
13 of FM, including a group-based coping intervention to strengthen patients' health promoting  
14  
15 resources (the VTP) and graded physical exercise<sup>9</sup>. The rationale for offering patients the  
16  
17 VTP before the physical activity counselling is that many patients may have previous stressful  
18  
19 life experiences and emotional burdens that may be a barrier to lifestyle change<sup>48</sup>.

20  
21 Throughout the VTP the participants may acquire alternative coping strategies and more  
22  
23 constructive ways to deal with stress, which may facilitate their participation in physical  
24  
25 exercise. The individual physical activity counselling will follow the current practice at the  
26  
27 HLCs and thus ensure the feasibility of the intervention and strengthen the external validity of  
28  
29 the study. The inclusion of patients from both rural and urban communities will also enhance  
30  
31 the generalisability of the results.  
32  
33

34  
35 Some participants may experience the multicomponent rehabilitation programme to be too  
36  
37 comprehensive and recruiting sufficient number of patients may be a challenge. GPs in the  
38  
39 respective municipalities will be approached with information about the project before and  
40  
41 during the study period. Moreover, potential participants will be given extensive information  
42  
43 about the programme before they consent to participate and again before they start the VTP in  
44  
45 order to enhance adherence. Previous research shows that behavioural change takes time and  
46  
47 that interventions that include multiple strategies are more successful<sup>49</sup>. Many patients with  
48  
49 FM express frustration about the lack of treatment possibilities and have felt neglected by the  
50  
51 health care system<sup>50</sup>. They are likely to be motivated to receive any treatment that can  
52  
53  
54  
55  
56  
57  
58  
59  
60

1  
2  
3 improve their condition. Moreover, the Norwegian social security system can provide “sick-  
4  
5 leave for single treatment days” to facilitate participation during work time.

6  
7 The effect of the intervention will be measured in accordance with its aims and content. The  
8  
9 validity of the primary outcome measure, PGIC, has been assessed in a prospective  
10  
11 observational cohort study in FM patients and was found to be a clinically relevant measure to  
12  
13 assess perceived impact of disease management<sup>33</sup>. The secondary outcomes are based on a  
14  
15 recommended core set from OMERACT<sup>32</sup> and thus enable comparison with results from  
16  
17 other studies.

18  
19 The study has been developed in close collaboration with a project group comprising a patient  
20  
21 partner, a rheumatologist, two GPs and a health professional representing rehabilitation  
22  
23 service in one of the communities. If the intervention is proven effective, this group will  
24  
25 contribute to disseminating and implementing the results in clinical practice.  
26  
27  
28  
29

### 30 31 **Trial status**

32  
33 Enrolment for the trial began in November 2016 and recruitment is still in progress. Data  
34  
35 collection will continue until the target sample size is reached, approximately December  
36  
37 2018.  
38  
39  
40  
41  
42  
43  
44  
45  
46  
47  
48  
49  
50  
51  
52  
53  
54  
55  
56  
57  
58  
59  
60

## Footnotes

### Contributors

HAZ, KBH and EB conceived the project idea and designed the study. TH, HAZ and SAP are responsible for recruitment. TH and HAZ are responsible for acquisition of data and data management. TH has drafted the manuscript. HAZ has critically revised the manuscript. SAP, KBH and EB have read and approved the final manuscript.

### Funding

This work was supported by the Norwegian South-Eastern Regional Health Authority (grant number 2016015).

### Competing interests

The authors declare that they have no competing interest.

### Ethics approval

The researchers have obtained approval from the Regional Committee for Medical and Health Research Ethics in South East Norway (2015/2447/REK sørøst A). Written consent to participate will be collected before enrolment to the trial.

### Acknowledgements

The authors would like to thank Aase Frich, Thalita Blanck, Oddfrid Nesse, Ann-Grete Dybvik Akre, Unni Berit Schjervheim, Tove Borgen and Maja Berg Kristoffersen for participation in planning and practical facilitation of the study.

## References

1. Knudsen AK., Tollånes MC., Haaland ØA., et al. Sykdomsbyrde i Norge [Disease Burden in Norway 2015. Results from the Global Burden of Diseases, Injuries, and Risk Factors Study 2015 (GBD 2015)]. Bergen/ Oslo: National Institute of Public Health; 2017 [Available from: <https://www.fhi.no/publ/2017/sykdomsbyrde-i-norge-2015/>].
2. Nielsen CS, Skurtveit SO, Steingrimsdottir OA, et al. Langvarige smertetilstander i Norge. Forekomsten av langvarige smertetilstander i Norge. Forskjeller mellom kvinner og menn. Samfunnskostnader. [Chronic pain in Norway] Oslo/ Bergen National Institute of Public Health; 2014 [Available from: <https://www.fhi.no/nettpub/hin/helse-og-sykdom/langvarige-smertetilstander-i-norge/>].
3. Queiroz LP. Worldwide Epidemiology of Fibromyalgia. Current pain and headache reports 2013;**17**(8):356.
4. J.M. Kinge AKK, V. Skirbekk, S.E. Vollset. Musculoskeletal disorders in Norway: prevalence of chronicity and use of primary and specialist health care services. BMC musculoskeletal disorder 2015;**16**(75).
5. Wolfe F, Clauw DJ, Fitzcharles M-A, et al. The American College of Rheumatology Preliminary Diagnostic Criteria for Fibromyalgia and Measurement of Symptom Severity. Arthritis Care & Research 2010;**62**(5):600-10.
6. Macfarlane GJ, Kronisch C, Dean LE, et al. EULAR revised recommendations for the management of fibromyalgia. Annals of the Rheumatic Diseases 2017;**76**(2):318-28.
7. Kool MB, van Middendorp H, Boeije HR, et al. Understanding the lack of understanding: invalidation from the perspective of the patient with fibromyalgia. Arthritis and rheumatism 2009;**61**(12):1650-6.
8. Nuesch E HW, Bernardy K, Barth J, Juni P. Comparative efficacy of pharmacological and non-pharmacological interventions in fibromyalgia syndrom: network meta-analysis. Annals of the rheumatic diseases 2013;**72**:955-62.
9. Macfarlane GJ, Kronisch C, Dean LE, et al. EULAR revised recommendations for the management of fibromyalgia. Ann Rheum Dis 2016.
10. Health TND. Muskel- og skjelettsmerter - uten leddhevelser, uten inflammasjonparametre [https://helsedirektoratet.no/retningslinjer/revmatologi/seksjon?Tittel=muskel-og-skjelettsmerter-9647#muskel--og-skjelettsmerter---uten-leddhevelser,-uten-inflammasjonparametre-\(ikke-rett\):Helsedirektoratet;2015](https://helsedirektoratet.no/retningslinjer/revmatologi/seksjon?Tittel=muskel-og-skjelettsmerter-9647#muskel--og-skjelettsmerter---uten-leddhevelser,-uten-inflammasjonparametre-(ikke-rett):Helsedirektoratet;2015) [updated 2.11.2015].
11. van Middendorp H, Lumley MA, Jacobs JW, et al. Emotions and emotional approach and avoidance strategies in fibromyalgia. J Psychosom Res 2008;**64**(2):159-67.
12. Geenen R, van Ooijen-van der Linden L, Lumley MA, et al. The match-mismatch model of emotion processing styles and emotion regulation strategies in fibromyalgia. J Psychosom Res 2012;**72**(1):45-50.
13. Grossman P, Niemann L, Schmidt S, et al. Mindfulness-based stress reduction and health benefits. A meta-analysis. J Psychosom Res 2004;**57**(1):35-43.
14. Kabat-Zinn J. *Full Catastrophe Living: Using the Wisdom of Your Body and Mind to Face Stress, Pain and Illness*. New York.: Delacorte, 2013.
15. Day MA, Jensen MP, Ehde DM, et al. Toward a theoretical model for mindfulness-based pain management. The journal of pain: official journal of the American Pain Society 2014;**15**(7):691-703.
16. Lauche R, Cramer H, Hauser W, et al. A systematic overview of reviews for complementary and alternative therapies in the treatment of the fibromyalgia syndrome. Evidence-Based Complementary and Alternative Medicine 2015;**2015**:610615.

17. Veehof MM, Trompetter HR, Bohlmeijer ET, et al. Acceptance- and mindfulness-based interventions for the treatment of chronic pain: a meta-analytic review. *Cogn Behav Ther* 2016;**45**(1):5-31.
18. Steen E, Haugli L. The body has a history: an educational intervention programme for people with generalised chronic musculoskeletal pain. *Patient Educ Couns* 2000;**41**(2):181-95.
19. Zangi HA, Mowinckel P, Finset A, et al. A mindfulness-based group intervention to reduce psychological distress and fatigue in patients with inflammatory rheumatic joint diseases: a randomised controlled trial. *Ann Rheum Dis* 2012;**71**(6):911-7.
20. Haugli L, Steen E, Laerum E, et al. Learning to have less pain - is it possible? A one-year follow-up study of the effects of a personal construct group learning programme on patients with chronic musculoskeletal pain. *Patient education and counseling* 2001;**45**(2):111-8.
21. Zangi HA, Finset A, Steen E, et al. The effects of a vitality training programme on psychological distress in patient with infalammatory rheumatic diseases and fibromyalgia: a 1-year follow-up. *Scand J Rheumatol* 2009;**38**:231-34.
22. Zangi HA, Hauge MI, Steen E, et al. "I am not only a disease, I am so much more". Patients with rheumatic diseases' experiences of an emotion-focused group intervention. *Patient Educ Couns* 2011;**85**(3):419-24.
23. Caspersen CJ, Powell KE, Christenson GM. Physical activity, exercise, and physical fitness: definitions and distinctions for health-related research. *Public health reports (Washington, DC: 1974)* 1985;**100**(2):126-31.
24. McLoughlin MJ, Colbert LH, Stegner AJ, et al. Are women with fibromyalgia less physically active than healthy women? *Medicine and science in sports and exercise* 2011;**43**(5):905-12.
25. Hauser W, Klose P, Langhorst J, et al. Efficacy of different types of aerobic exercise in fibromyalgia syndrome: a systematic review and meta-analysis of randomised controlled trials (Provisional abstract). *Arthritis Research and Therapy* 2010; **12**(3). <http://onlinelibrary.wiley.com/o/cochrane/cldare/articles/DARE-12011000221/frame.html>.
26. Nelson N. Muscle strengthening activities and fibromyalgia: A review of pain and strength outcomes. *Journal of Bodywork and Movement Therapies* 2015;**19**(2):370-6.
27. Denison E, Underland V, Berg R, et al. Effects of more than three months organized follow-up on physical activity and diet for people with increased risk of lifestyle related disease. Oslo: Nasjonalt kunnskapssenter for helsetjenesten (Kunnskapssenteret), Norwegian Knowledge Centre for the Health Service, 2014.
28. Lundahl B, Burke BL. The effectiveness and applicability of motivational interviewing: a practice-friendly review of four meta-analyses. *Journal of clinical psychology* 2009;**65**(11):1232-45.
29. Craig P, Dieppe P, Macintyre S, et al. Developing and evaluating complex interventions: the new Medical Research Council guidance. *BMJ* 2008;**337**.
30. Chan A-W, Tetzlaff JM, Altman DG, et al. SPIRIT 2013: new guidance for content of clinical trial protocols. *The Lancet*; **381**(9861):91-92.
31. Mease PJ, Clauw DJ, Christensen R, et al. Toward development of a fibromyalgia responder index and disease activity score: OMERACT module update. *J Rheumatol* 2011;**38**(7):1487-95.
32. Choy EH, Arnold LM, Clauw DJ, et al. Content and criterion validity of the preliminary core dataset for clinical trials in fibromyalgia syndrome. *J Rheumatol* 2009;**36**(10):2330-4.

- 1  
2  
3 33. Rampakakis E, Ste-Marie PA, Sampalis JS, et al. Real-life assessment of the validity of  
4 patient global impression of change in fibromyalgia. *RMD open* 2015;**1**(1):e000146.
- 5 34. McBeth J, Prescott G, Scotland G, et al. Cognitive behavior therapy, exercise, or both for  
6 treating chronic widespread pain. *Archives of internal medicine* 2012;**172**(1):48-57.
- 7 35. Beasley M, Prescott GJ, Scotland G, et al. Patient-reported improvements in health are  
8 maintained 2 years after completing a short course of cognitive behaviour therapy,  
9 exercise or both treatments for chronic widespread pain: long-term results from the  
10 MUSICIAN randomised controlled trial. *RMD Open* 2015;**1**(1).
- 11 36. Richards SC, Scott DL. Prescribed exercise in people with fibromyalgia: parallel group  
12 randomised controlled trial. *Bmj* 2002;**325**(7357):185.
- 13 37. Malt UF, Mogstad TE, Refnin IB. [Goldberg's General Health Questionnaire]. *Tidsskrift*  
14 *for den Norske laegeforening : tidsskrift for praktisk medicin, ny raeke*  
15 *1989*;**109**(13):1391-4.
- 16 38. Malt UF. The validity of the General Health Questionnaire in a sample of accidentally  
17 injured adults. *Acta Psychiatr Scand Suppl* 1989;**355**(103-12).
- 18 39. Dundas I, Vøllestad J, Binder P-E, et al. The Five Factor Mindfulness Questionnaire in  
19 Norway. *Scandinavian Journal of Psychology* 2013(54):250-60.
- 20 40. Baer RA, Smith GT, Hopkins J, et al. Using self-report assessment methods to explore  
21 facets of mindfulness. *Assessment* 2006;**13**(1):27-45.
- 22 41. Herdman M, Gudex C, Lloyd A, et al. Development and preliminary testing of the new  
23 five-level version of EQ-5D (EQ-5D-5L). *Quality of life research: an international*  
24 *journal of quality of life aspects of treatment, care and rehabilitation*  
25 *2011*;**20**(10):1727-36.
- 26 42. Obradovic M, Lal A, Liedgens H. Validity and responsiveness of EuroQol-5 dimension  
27 (EQ-5D) versus Short Form-6 dimension (SF-6D) questionnaire in chronic pain.  
28 *Health and quality of life outcomes* 2013;**11**:110.
- 29 43. Solberg TK, Olsen JA, Ingebrigtsen T, et al. Health-related quality of life assessment by  
30 the EuroQol-5D can provide cost-utility data in the field of low-back surgery.  
31 *European spine journal: official publication of the European Spine Society, the*  
32 *European Spinal Deformity Society, and the European Section of the Cervical Spine*  
33 *Research Society* 2005;**14**(10):1000-7.
- 34 44. Kurtze N, Rangul V, Hustvedt BE, et al. Reliability and validity of self-reported physical  
35 activity in the Nord-Trondelag Health Study: HUNT 1. *Scandinavian journal of public*  
36 *health* 2008;**36**(1):52-61.
- 37 45. Gecht MR, Connell KJ, Sinacore JM, et al. A survey of exercise beliefs and exercise  
38 habits among people with arthritis. *Arthritis care and research : the official journal of*  
39 *the Arthritis Health Professions Association* 1996;**9**(2):82-8.
- 40 46. Reilly MC, Gooch KL, Wong RL, et al. Validity, reliability and responsiveness of the  
41 Work Productivity and Activity Impairment Questionnaire in ankylosing spondylitis.  
42 *Rheumatology (Oxford, England)* 2010;**49**(4):812-9.
- 43 47. eHealth TND. "Norm for informasjonssikkerhet". Oslo: Ministry of Health and Care  
44 Services, 2016.
- 45 48. Følling IS, Solbjør M, Helvik A-S. Previous experiences and emotional baggage as  
46 barriers to lifestyle change - a qualitative study of Norwegian Healthy Life Centre  
47 participants. *BMC Family Practice* 2015;**16**(1):73.
- 48 49. van Achterberg T, Huisman-de Waal GGJ, Ketelaar NABM, et al. How to promote  
49 healthy behaviours in patients? An overview of evidence for behaviour change  
50 techniques. *Health Promotion International* 2011;**26**(2):148-62.
- 51  
52  
53  
54  
55  
56  
57  
58  
59  
60

1  
2  
3 50. Kool MB, Geenen R. Loneliness in Patients with Rheumatic Diseases: The Significance  
4 of Invalidation and Lack of Social Support. The Journal of Psychology 2012;**146**(1-  
5 2):229-41.  
6  
7

8  
9 Figure legend

10  
11 Figure 1. Study Flow chart  
12  
13  
14  
15  
16  
17  
18  
19  
20  
21  
22  
23  
24  
25  
26  
27  
28  
29  
30  
31  
32  
33  
34  
35  
36  
37  
38  
39  
40  
41  
42  
43  
44  
45  
46  
47  
48  
49  
50  
51  
52  
53  
54  
55  
56  
57  
58  
59  
60

For peer review only

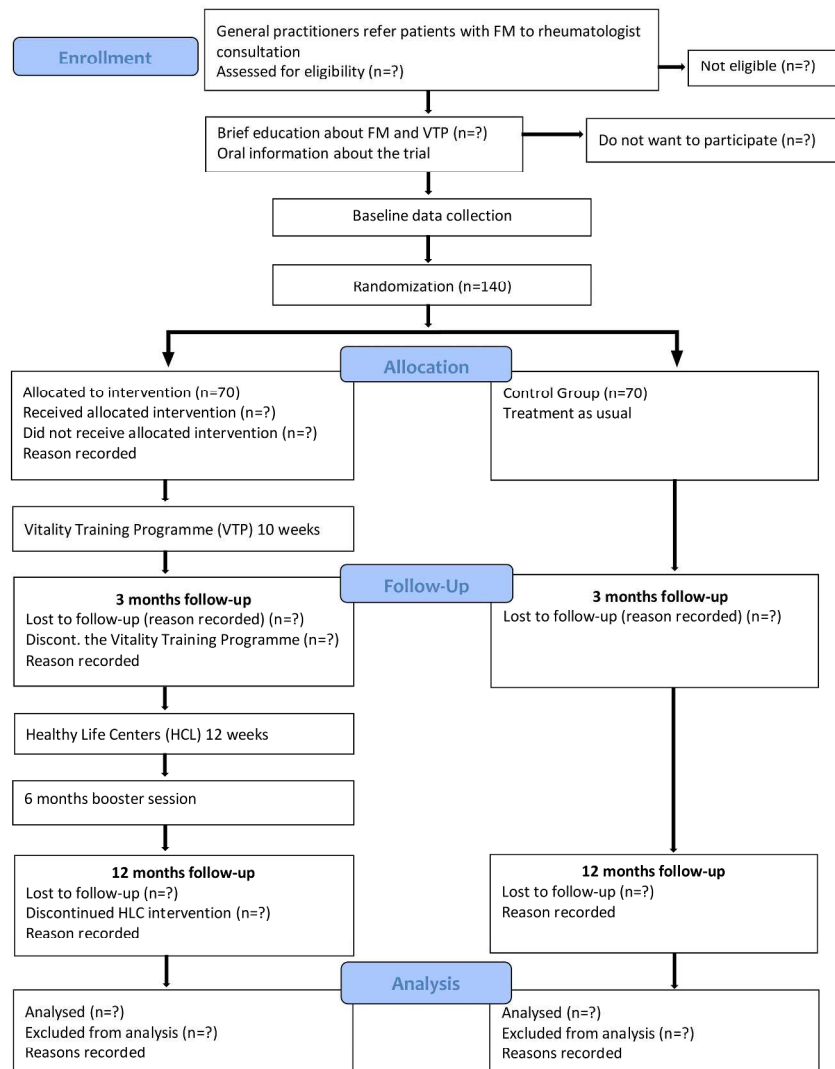

Figure 1. Study Flow chart

279x361mm (300 x 300 DPI)



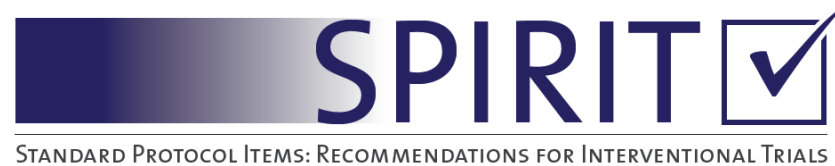

SPIRIT 2013 Checklist: Recommended items to address in a clinical trial protocol and related documents\*

| Section/item                      | Item No | Description                                                                                                                                                                                                                                                                              | Addressed on page number |
|-----------------------------------|---------|------------------------------------------------------------------------------------------------------------------------------------------------------------------------------------------------------------------------------------------------------------------------------------------|--------------------------|
| <b>Administrative information</b> |         |                                                                                                                                                                                                                                                                                          |                          |
| Title                             | 1       | Descriptive title identifying the study design, population, interventions, and, if applicable, trial acronym                                                                                                                                                                             | 1                        |
| Trial registration                | 2a      | Trial identifier and registry name. If not yet registered, name of intended registry                                                                                                                                                                                                     | 3                        |
|                                   | 2b      | All items from the World Health Organization Trial Registration Data Set                                                                                                                                                                                                                 | NA                       |
| Protocol version                  | 3       | Date and version identifier                                                                                                                                                                                                                                                              | 3                        |
| Funding                           | 4       | Sources and types of financial, material, and other support                                                                                                                                                                                                                              | 20                       |
| Roles and responsibilities        | 5a      | Names, affiliations, and roles of protocol contributors                                                                                                                                                                                                                                  | 1                        |
|                                   | 5b      | Name and contact information for the trial sponsor                                                                                                                                                                                                                                       | 20                       |
|                                   | 5c      | Role of study sponsor and funders, if any, in study design; collection, management, analysis, and interpretation of data; writing of the report; and the decision to submit the report for publication, including whether they will have ultimate authority over any of these activities | NA                       |
|                                   | 5d      | Composition, roles, and responsibilities of the coordinating centre, steering committee, endpoint adjudication committee, data management team, and other individuals or groups overseeing the trial, if applicable (see Item 21a for data monitoring committee)                         | NA                       |

|    |                                                           |     |                                                                                                               |          |
|----|-----------------------------------------------------------|-----|---------------------------------------------------------------------------------------------------------------|----------|
| 1  | <b>Introduction</b>                                       |     |                                                                                                               |          |
| 2  |                                                           |     |                                                                                                               |          |
| 3  | Background and                                            | 6a  | Description of research question and justification for undertaking the trial, including summary of relevant   | 4 - 8    |
| 4  | rationale                                                 |     | studies (published and unpublished) examining benefits and harms for each intervention                        |          |
| 5  |                                                           |     |                                                                                                               |          |
| 6  |                                                           | 6b  | Explanation for choice of comparators                                                                         | NA       |
| 7  |                                                           |     |                                                                                                               |          |
| 8  | Objectives                                                | 7   | Specific objectives or hypotheses                                                                             | 7 - 8    |
| 9  |                                                           |     |                                                                                                               |          |
| 10 | Trial design                                              | 8   | Description of trial design including type of trial (eg, parallel group, crossover, factorial, single group), |          |
| 11 |                                                           |     | allocation ratio, and framework (eg, superiority, equivalence, noninferiority, exploratory)                   | 8        |
| 12 |                                                           |     |                                                                                                               |          |
| 13 |                                                           |     |                                                                                                               |          |
| 14 | <b>Methods: Participants, interventions, and outcomes</b> |     |                                                                                                               |          |
| 15 |                                                           |     |                                                                                                               |          |
| 16 | Study setting                                             | 9   | Description of study settings (eg, community clinic, academic hospital) and list of countries where data will | 9 - 10   |
| 17 |                                                           |     | be collected. Reference to where list of study sites can be obtained                                          |          |
| 18 |                                                           |     |                                                                                                               |          |
| 19 | Eligibility criteria                                      | 10  | Inclusion and exclusion criteria for participants. If applicable, eligibility criteria for study centres and  | 10       |
| 20 |                                                           |     | individuals who will perform the interventions (eg, surgeons, psychotherapists)                               |          |
| 21 |                                                           |     |                                                                                                               |          |
| 22 | Interventions                                             | 11a | Interventions for each group with sufficient detail to allow replication, including how and when they will be | 10 - 12  |
| 23 |                                                           |     | administered                                                                                                  |          |
| 24 |                                                           |     |                                                                                                               |          |
| 25 |                                                           | 11b | Criteria for discontinuing or modifying allocated interventions for a given trial participant (eg, drug dose  | NA       |
| 26 |                                                           |     | change in response to harms, participant request, or improving/worsening disease)                             |          |
| 27 |                                                           |     |                                                                                                               |          |
| 28 |                                                           | 11c | Strategies to improve adherence to intervention protocols, and any procedures for monitoring adherence        | NA       |
| 29 |                                                           |     | (eg, drug tablet return, laboratory tests)                                                                    |          |
| 30 |                                                           |     |                                                                                                               |          |
| 31 |                                                           | 11d | Relevant concomitant care and interventions that are permitted or prohibited during the trial                 | 12       |
| 32 |                                                           |     |                                                                                                               |          |
| 33 | Outcomes                                                  | 12  | Primary, secondary, and other outcomes, including the specific measurement variable (eg, systolic blood       | 12 - 14  |
| 34 |                                                           |     | pressure), analysis metric (eg, change from baseline, final value, time to event), method of aggregation (eg, |          |
| 35 |                                                           |     | median, proportion), and time point for each outcome. Explanation of the clinical relevance of chosen         |          |
| 36 |                                                           |     | efficacy and harm outcomes is strongly recommended                                                            |          |
| 37 |                                                           |     |                                                                                                               |          |
| 38 | Participant timeline                                      | 13  | Time schedule of enrolment, interventions (including any run-ins and washouts), assessments, and visits for   | Figure 1 |
| 39 |                                                           |     | participants. A schematic diagram is highly recommended (see Figure)                                          |          |
| 40 |                                                           |     |                                                                                                               |          |
| 41 |                                                           |     |                                                                                                               |          |
| 42 |                                                           |     |                                                                                                               |          |
| 43 |                                                           |     |                                                                                                               |          |
| 44 |                                                           |     |                                                                                                               |          |
| 45 |                                                           |     |                                                                                                               |          |
| 46 |                                                           |     |                                                                                                               |          |

|   |             |    |                                                                                                                                                                                       |        |
|---|-------------|----|---------------------------------------------------------------------------------------------------------------------------------------------------------------------------------------|--------|
| 1 | Sample size | 14 | Estimated number of participants needed to achieve study objectives and how it was determined, including clinical and statistical assumptions supporting any sample size calculations | 14     |
| 2 |             |    |                                                                                                                                                                                       |        |
| 3 |             |    |                                                                                                                                                                                       |        |
| 4 | Recruitment | 15 | Strategies for achieving adequate participant enrolment to reach target sample size                                                                                                   | 9 – 10 |
| 5 |             |    |                                                                                                                                                                                       |        |

### 6 **Methods: Assignment of interventions (for controlled trials)**

#### 7 Allocation:

|    |                    |     |                                                                                                                                                                                                                                                                                                                                                          |    |
|----|--------------------|-----|----------------------------------------------------------------------------------------------------------------------------------------------------------------------------------------------------------------------------------------------------------------------------------------------------------------------------------------------------------|----|
| 8  |                    |     |                                                                                                                                                                                                                                                                                                                                                          |    |
| 9  |                    |     |                                                                                                                                                                                                                                                                                                                                                          |    |
| 10 | Sequence           | 16a | Method of generating the allocation sequence (eg, computer-generated random numbers), and list of any factors for stratification. To reduce predictability of a random sequence, details of any planned restriction (eg, blocking) should be provided in a separate document that is unavailable to those who enrol participants or assign interventions | 14 |
| 11 | generation         |     |                                                                                                                                                                                                                                                                                                                                                          |    |
| 12 |                    |     |                                                                                                                                                                                                                                                                                                                                                          |    |
| 13 |                    |     |                                                                                                                                                                                                                                                                                                                                                          |    |
| 14 |                    |     |                                                                                                                                                                                                                                                                                                                                                          |    |
| 15 |                    |     |                                                                                                                                                                                                                                                                                                                                                          |    |
| 16 | Allocation         | 16b | Mechanism of implementing the allocation sequence (eg, central telephone; sequentially numbered, opaque, sealed envelopes), describing any steps to conceal the sequence until interventions are assigned                                                                                                                                                | 14 |
| 17 | concealment        |     |                                                                                                                                                                                                                                                                                                                                                          |    |
| 18 | mechanism          |     |                                                                                                                                                                                                                                                                                                                                                          |    |
| 19 |                    |     |                                                                                                                                                                                                                                                                                                                                                          |    |
| 20 | Implementation     | 16c | Who will generate the allocation sequence, who will enrol participants, and who will assign participants to interventions                                                                                                                                                                                                                                | 14 |
| 21 |                    |     |                                                                                                                                                                                                                                                                                                                                                          |    |
| 22 |                    |     |                                                                                                                                                                                                                                                                                                                                                          |    |
| 23 |                    |     |                                                                                                                                                                                                                                                                                                                                                          |    |
| 24 | Blinding (masking) | 17a | Who will be blinded after assignment to interventions (eg, trial participants, care providers, outcome assessors, data analysts), and how                                                                                                                                                                                                                | 14 |
| 25 |                    |     |                                                                                                                                                                                                                                                                                                                                                          |    |
| 26 |                    |     |                                                                                                                                                                                                                                                                                                                                                          |    |
| 27 |                    | 17b | If blinded, circumstances under which unblinding is permissible, and procedure for revealing a participant's allocated intervention during the trial                                                                                                                                                                                                     | NA |
| 28 |                    |     |                                                                                                                                                                                                                                                                                                                                                          |    |
| 29 |                    |     |                                                                                                                                                                                                                                                                                                                                                          |    |
| 30 |                    |     |                                                                                                                                                                                                                                                                                                                                                          |    |

### 31 **Methods: Data collection, management, and analysis**

|    |                 |     |                                                                                                                                                                                                                                                                                                                                                                                                              |         |
|----|-----------------|-----|--------------------------------------------------------------------------------------------------------------------------------------------------------------------------------------------------------------------------------------------------------------------------------------------------------------------------------------------------------------------------------------------------------------|---------|
| 32 |                 |     |                                                                                                                                                                                                                                                                                                                                                                                                              |         |
| 33 | Data collection | 18a | Plans for assessment and collection of outcome, baseline, and other trial data, including any related processes to promote data quality (eg, duplicate measurements, training of assessors) and a description of study instruments (eg, questionnaires, laboratory tests) along with their reliability and validity, if known. Reference to where data collection forms can be found, if not in the protocol | 12 - 15 |
| 34 | methods         |     |                                                                                                                                                                                                                                                                                                                                                                                                              |         |
| 35 |                 |     |                                                                                                                                                                                                                                                                                                                                                                                                              |         |
| 36 |                 |     |                                                                                                                                                                                                                                                                                                                                                                                                              |         |
| 37 |                 |     |                                                                                                                                                                                                                                                                                                                                                                                                              |         |
| 38 |                 |     |                                                                                                                                                                                                                                                                                                                                                                                                              |         |
| 39 |                 | 18b | Plans to promote participant retention and complete follow-up, including list of any outcome data to be collected for participants who discontinue or deviate from intervention protocols                                                                                                                                                                                                                    | 15      |
| 40 |                 |     |                                                                                                                                                                                                                                                                                                                                                                                                              |         |
| 41 |                 |     |                                                                                                                                                                                                                                                                                                                                                                                                              |         |
| 42 |                 |     |                                                                                                                                                                                                                                                                                                                                                                                                              |         |

|    |                                 |     |                                                                                                                                                                                                                                                                                                                                       |         |
|----|---------------------------------|-----|---------------------------------------------------------------------------------------------------------------------------------------------------------------------------------------------------------------------------------------------------------------------------------------------------------------------------------------|---------|
| 1  | Data management                 | 19  | Plans for data entry, coding, security, and storage, including any related processes to promote data quality (eg, double data entry; range checks for data values). Reference to where details of data management procedures can be found, if not in the protocol                                                                     | 15 - 16 |
| 2  |                                 |     |                                                                                                                                                                                                                                                                                                                                       |         |
| 3  |                                 |     |                                                                                                                                                                                                                                                                                                                                       |         |
| 4  |                                 |     |                                                                                                                                                                                                                                                                                                                                       |         |
| 5  | Statistical methods             | 20a | Statistical methods for analysing primary and secondary outcomes. Reference to where other details of the statistical analysis plan can be found, if not in the protocol                                                                                                                                                              | 15      |
| 6  |                                 |     |                                                                                                                                                                                                                                                                                                                                       |         |
| 7  |                                 |     |                                                                                                                                                                                                                                                                                                                                       |         |
| 8  |                                 | 20b | Methods for any additional analyses (eg, subgroup and adjusted analyses)                                                                                                                                                                                                                                                              | NA      |
| 9  |                                 |     |                                                                                                                                                                                                                                                                                                                                       |         |
| 10 |                                 | 20c | Definition of analysis population relating to protocol non-adherence (eg, as randomised analysis), and any statistical methods to handle missing data (eg, multiple imputation)                                                                                                                                                       | 15 - 16 |
| 11 |                                 |     |                                                                                                                                                                                                                                                                                                                                       |         |
| 12 |                                 |     |                                                                                                                                                                                                                                                                                                                                       |         |
| 13 |                                 |     |                                                                                                                                                                                                                                                                                                                                       |         |
| 14 | <b>Methods: Monitoring</b>      |     |                                                                                                                                                                                                                                                                                                                                       |         |
| 15 |                                 |     |                                                                                                                                                                                                                                                                                                                                       |         |
| 16 | Data monitoring                 | 21a | Composition of data monitoring committee (DMC); summary of its role and reporting structure; statement of whether it is independent from the sponsor and competing interests; and reference to where further details about its charter can be found, if not in the protocol. Alternatively, an explanation of why a DMC is not needed | NA      |
| 17 |                                 |     |                                                                                                                                                                                                                                                                                                                                       |         |
| 18 |                                 |     |                                                                                                                                                                                                                                                                                                                                       |         |
| 19 |                                 |     |                                                                                                                                                                                                                                                                                                                                       |         |
| 20 |                                 |     |                                                                                                                                                                                                                                                                                                                                       |         |
| 21 |                                 |     |                                                                                                                                                                                                                                                                                                                                       |         |
| 22 |                                 | 21b | Description of any interim analyses and stopping guidelines, including who will have access to these interim results and make the final decision to terminate the trial                                                                                                                                                               | NA      |
| 23 |                                 |     |                                                                                                                                                                                                                                                                                                                                       |         |
| 24 |                                 |     |                                                                                                                                                                                                                                                                                                                                       |         |
| 25 | Harms                           | 22  | Plans for collecting, assessing, reporting, and managing solicited and spontaneously reported adverse events and other unintended effects of trial interventions or trial conduct                                                                                                                                                     | 14      |
| 26 |                                 |     |                                                                                                                                                                                                                                                                                                                                       |         |
| 27 |                                 |     |                                                                                                                                                                                                                                                                                                                                       |         |
| 28 | Auditing                        | 23  | Frequency and procedures for auditing trial conduct, if any, and whether the process will be independent from investigators and the sponsor                                                                                                                                                                                           | NA      |
| 29 |                                 |     |                                                                                                                                                                                                                                                                                                                                       |         |
| 30 |                                 |     |                                                                                                                                                                                                                                                                                                                                       |         |
| 31 |                                 |     |                                                                                                                                                                                                                                                                                                                                       |         |
| 32 | <b>Ethics and dissemination</b> |     |                                                                                                                                                                                                                                                                                                                                       |         |
| 33 |                                 |     |                                                                                                                                                                                                                                                                                                                                       |         |
| 34 | Research ethics approval        | 24  | Plans for seeking research ethics committee/institutional review board (REC/IRB) approval                                                                                                                                                                                                                                             | 16      |
| 35 |                                 |     |                                                                                                                                                                                                                                                                                                                                       |         |
| 36 |                                 |     |                                                                                                                                                                                                                                                                                                                                       |         |
| 37 | Protocol amendments             | 25  | Plans for communicating important protocol modifications (eg, changes to eligibility criteria, outcomes, analyses) to relevant parties (eg, investigators, REC/IRBs, trial participants, trial registries, journals, regulators)                                                                                                      | NA      |
| 38 |                                 |     |                                                                                                                                                                                                                                                                                                                                       |         |
| 39 |                                 |     |                                                                                                                                                                                                                                                                                                                                       |         |
| 40 |                                 |     |                                                                                                                                                                                                                                                                                                                                       |         |
| 41 |                                 |     |                                                                                                                                                                                                                                                                                                                                       |         |
| 42 |                                 |     |                                                                                                                                                                                                                                                                                                                                       |         |
| 43 |                                 |     |                                                                                                                                                                                                                                                                                                                                       |         |
| 44 |                                 |     |                                                                                                                                                                                                                                                                                                                                       |         |
| 45 |                                 |     |                                                                                                                                                                                                                                                                                                                                       |         |
| 46 |                                 |     |                                                                                                                                                                                                                                                                                                                                       |         |

|    |                               |     |                                                                                                                                                                                                                                                                                     |                             |
|----|-------------------------------|-----|-------------------------------------------------------------------------------------------------------------------------------------------------------------------------------------------------------------------------------------------------------------------------------------|-----------------------------|
| 1  | Consent or assent             | 26a | Who will obtain informed consent or assent from potential trial participants or authorised surrogates, and how (see Item 32)                                                                                                                                                        | 9                           |
| 2  |                               |     |                                                                                                                                                                                                                                                                                     |                             |
| 3  |                               |     |                                                                                                                                                                                                                                                                                     |                             |
| 4  |                               | 26b | Additional consent provisions for collection and use of participant data and biological specimens in ancillary studies, if applicable                                                                                                                                               | NA                          |
| 5  |                               |     |                                                                                                                                                                                                                                                                                     |                             |
| 6  |                               |     |                                                                                                                                                                                                                                                                                     |                             |
| 7  | Confidentiality               | 27  | How personal information about potential and enrolled participants will be collected, shared, and maintained in order to protect confidentiality before, during, and after the trial                                                                                                | 16                          |
| 8  |                               |     |                                                                                                                                                                                                                                                                                     |                             |
| 9  |                               |     |                                                                                                                                                                                                                                                                                     |                             |
| 10 | Declaration of interests      | 28  | Financial and other competing interests for principal investigators for the overall trial and each study site                                                                                                                                                                       | 20                          |
| 11 |                               |     |                                                                                                                                                                                                                                                                                     |                             |
| 12 |                               |     |                                                                                                                                                                                                                                                                                     |                             |
| 13 | Access to data                | 29  | Statement of who will have access to the final trial dataset, and disclosure of contractual agreements that limit such access for investigators                                                                                                                                     | 16                          |
| 14 |                               |     |                                                                                                                                                                                                                                                                                     |                             |
| 15 |                               |     |                                                                                                                                                                                                                                                                                     |                             |
| 16 |                               |     |                                                                                                                                                                                                                                                                                     |                             |
| 17 | Ancillary and post-trial care | 30  | Provisions, if any, for ancillary and post-trial care, and for compensation to those who suffer harm from trial participation                                                                                                                                                       | NA                          |
| 18 |                               |     |                                                                                                                                                                                                                                                                                     |                             |
| 19 |                               |     |                                                                                                                                                                                                                                                                                     |                             |
| 20 | Dissemination policy          | 31a | Plans for investigators and sponsor to communicate trial results to participants, healthcare professionals, the public, and other relevant groups (eg, via publication, reporting in results databases, or other data sharing arrangements), including any publication restrictions | 19                          |
| 21 |                               |     |                                                                                                                                                                                                                                                                                     |                             |
| 22 |                               |     |                                                                                                                                                                                                                                                                                     |                             |
| 23 |                               |     |                                                                                                                                                                                                                                                                                     |                             |
| 24 |                               | 31b | Authorship eligibility guidelines and any intended use of professional writers                                                                                                                                                                                                      | NA                          |
| 25 |                               |     |                                                                                                                                                                                                                                                                                     |                             |
| 26 |                               | 31c | Plans, if any, for granting public access to the full protocol, participant-level dataset, and statistical code                                                                                                                                                                     | NA                          |
| 27 |                               |     |                                                                                                                                                                                                                                                                                     |                             |
| 28 |                               |     |                                                                                                                                                                                                                                                                                     |                             |
| 29 | <b>Appendices</b>             |     |                                                                                                                                                                                                                                                                                     |                             |
| 30 |                               |     |                                                                                                                                                                                                                                                                                     |                             |
| 31 | Informed consent materials    | 32  | Model consent form and other related documentation given to participants and authorised surrogates                                                                                                                                                                                  | NA (available in Norwegian) |
| 32 |                               |     |                                                                                                                                                                                                                                                                                     |                             |
| 33 |                               |     |                                                                                                                                                                                                                                                                                     |                             |
| 34 | Biological specimens          | 33  | Plans for collection, laboratory evaluation, and storage of biological specimens for genetic or molecular analysis in the current trial and for future use in ancillary studies, if applicable                                                                                      | NA                          |
| 35 |                               |     |                                                                                                                                                                                                                                                                                     |                             |
| 36 |                               |     |                                                                                                                                                                                                                                                                                     |                             |

\*It is strongly recommended that this checklist be read in conjunction with the SPIRIT 2013 Explanation & Elaboration for important clarification on the items. Amendments to the protocol should be tracked and dated. The SPIRIT checklist is copyrighted by the SPIRIT Group under the Creative Commons "[Attribution-NonCommercial-NoDerivs 3.0 Unported](https://creativecommons.org/licenses/by-nc-nd/3.0/)" license.

## Online Supplementary file 2

### Example from group session 6: Anger

The first part of the programme is common in all sessions: Participants are invited to share their reflection on experiences from home exercises after previous session in group of three to four persons. They are encouraged to read their reflective diaries for each other and to share and listen with an open, non-judgemental attitude without discussing or giving advice. Next, participants are invited to take part in an awareness exercise instructed by one of the group facilitators. They are guided to attend to their thoughts, feelings and bodily senses in the present moment with openness, acceptance and curiosity. After the exercise, they are invited to share their experiences with one other person in the group.

In the next part of the session, the group facilitators introduce the topic “anger” by giving a short introduction about relationship between chronic illness and emotions and the purpose of addressing emotions. The participants are then invited to take part in an exercise with awareness of anger, introduced by one of the facilitators: “Think of the word anger... or to be angry. Notice what you become aware of... thoughts, maybe concrete situations, perhaps memories from the past... Are the situations that you become aware of new or old? Maybe both?... What do you experience in your body right now when you think of anger or being angry?... Also note whether the word anger or being angry evokes any other feelings...”

Awareness of anger is continued in movement to music. The music allows participants to express anger with their body and they are invited to let their bodies do what they want to do while listening to the music. Then, written hypothetical sentences are used to enhance discovery to tacit knowledge, for example: “If there are any other emotions related to my feeling of anger, it must be...” Participants are further invited to share and reflect upon experiences and discoveries from the exercise in small groups and in a plenary session.

1  
2  
3 The next exercise is a guided imagery intending to help individuals to connect to their  
4 experiences of anger in the present moment, and to explore its meaning. Further, crayons and  
5 white paper are used to draw an image of anger as experienced here and now. Again,  
6  
7 participants are invited to share and reflect in small groups and in plenary, with focus on new  
8  
9 discoveries and the consequences of these discoveries from the participants` daily life.  
10  
11 Finally, they write a diary about their experiences from the whole session.  
12  
13  
14  
15

16 Before closing the session, participants are asked to be aware of how they relate both to their  
17 own anger and anger from others in their daily lives. They are provided with guided  
18 mindfulness audio files and are encouraged to practice these exercises in everyday life and to  
19 train awareness in daily activities. They are asked to write reflective diaries about their  
20 thoughts, emotions and bodily senses. The session ends with a relaxation exercise. Each  
21 session follow the same structure with exercise adapted to the particular topic.  
22  
23  
24  
25  
26  
27  
28  
29  
30  
31

32 The group facilitators in the SALSA trial are health professionals, such as nurses and  
33 physiotherapists, and certified through a one-year university training programme (30 crd) at  
34 VID Specialized University in Oslo.  
35  
36  
37  
38  
39  
40  
41  
42  
43  
44  
45  
46  
47  
48  
49  
50  
51  
52  
53  
54  
55  
56  
57  
58  
59  
60

## Online Supplementary file 3

### Self-reported adverse events assessed at 12-months.

Have you carried out any type of treatment during the last year? (With treatment we mean medication, physical exercise, self-management course or any alternative treatments) Yes/ No Have you experienced any adverse event as a result of the treatment? Yes/ No If yes, which adverse events as a result of treatment? Elaborate In your opinion, which treatment(s) do you think the adverse event was/were caused by? Elaborate

For peer review only
