# Supplementary material for: Effects of a community-based multicomponent rehabilitation programme for patients with fibromyalgia: protocol for a randomised controlled trial
Source: PubMed Central journal article supplement — BMJ Open. 2018 Jun 4;8(6):e021004. doi: 10.1136/bmjopen-2017-021004 (PMC5988178; doi:10.1136/bmjopen-2017-021004), 2018-06-04
Supplement: bmjopen-2017-021004supp003.pdf [file bmjopen-2017-021004supp003.pdf]

## Online Supplementary file 3

### Self-reported adverse events assessed at 12-months.

Have you carried out any type of treatment during the last year? (With treatment we mean medication, physical exercise, self-management course or any alternative treatments) Yes/ No Have you experienced any adverse event as a result of the treatment? Yes/ No If yes, which adverse events as a result of treatment? Elaborate In your opinion, which treatment(s) do you think the adverse event was/were caused by? Elaborate
